# Supplementary material
Source: PubMed Central journal article supplement (PMC3063340)

## Online Supplemental Material

Genetics of Hypertension and Cardiovascular Disease and their Interconnected Pathways:

Lessons from Large Studies

---

Aldi T. Kraja DSc, PhD<sup>1\*</sup>, Steven C. Hunt, PhD<sup>2</sup>, D.C. Rao, PhD<sup>3</sup>, Víctor G. Dávila-Román, MD, FACC, FASE<sup>4</sup>, Donna K. Arnett, PhD, MSPH<sup>5</sup>, Michael A. Province, PhD<sup>1</sup>

<sup>1</sup>Division of Statistical Genomics, Washington University School of Medicine, St. Louis, MO;

<sup>2</sup>Division of Cardiovascular Genetics, University of Utah School of Medicine, Salt Lake City, UT;

<sup>3</sup>Division of Biostatistics, Washington University School of Medicine, St. Louis, MO;

<sup>4</sup>Cardiovascular Division, Washington University School of Medicine, St. Louis, MO;

<sup>5</sup>Department of Epidemiology, University of Alabama at Birmingham, Birmingham, AL.

### Emails:

A.T.K, [aldi@wustl.edu](mailto:aldi@wustl.edu)

S.C.H, [steve.hunt@utah.edu](mailto:steve.hunt@utah.edu)

D.C.R, [rao@wubios.wustl.edu](mailto:rao@wubios.wustl.edu)

V.G.D-R, [YDAVILA@DOM.wustl.edu](mailto:YDAVILA@DOM.wustl.edu)

D.K.A, [Arnett@ms.soph.uab.edu](mailto:Arnett@ms.soph.uab.edu)

M.A.P, [mprovince@wustl.edu](mailto:mprovince@wustl.edu)

### \*Corresponding author:

Aldi T. Kraja, DSc, PhD  
Division of Statistical Genomics  
Washington University School of Medicine  
4444 Forest Park Ave, St. Louis, MO 63108, USA.  
Email: [aldi@wustl.edu](mailto:aldi@wustl.edu)

**Supplemental Table 1.** The top ranked associations in HyperGEN African Americans for BP-factor.

| HyperGEN African Americans |            |        |                  |          |        |         |       |         |              |    |    |      |        |                |
|----------------------------|------------|--------|------------------|----------|--------|---------|-------|---------|--------------|----|----|------|--------|----------------|
| No                         | rsName     | FValue | ProbF<br>(n=908) | Estimate | StdErr | RSquare | Chrom | Alleles | Position(bp) | A1 | A2 | MAF  | Role   | Hugo           |
| 1                          | rs9672615  | 25.5   | 5.27E-07         | -0.43    | 0.09   | 0.041   | 15    | A/C     | 30298847     | 3  | 4  | 7.5  |        | (CHRNA7)       |
| 2                          | rs17105726 | 23.4   | 1.58E-06         | -0.42    | 0.09   | 0.039   | 10    | G/T     | 125397926    | 2  | 1  | 7.3  |        | (GPR26)        |
| 3                          | rs2147200  | 22.6   | 2.41E-06         | -0.27    | 0.06   | 0.045   | 6     | G/T     | 14086833     | 1  | 2  | 25.6 | utr-3  | RNF182         |
| 4                          | rs1434755  | 22.0   | 3.21E-06         | -0.24    | 0.05   | 0.037   | 8     | A/C     | 69205464     | 1  | 2  | 30.4 | intron | DEPDC2         |
| 5                          | rs7025910  | 21.6   | 3.86E-06         | 0.26     | 0.06   | 0.037   | 9     | A/G     | 79511878     | 3  | 1  | 21.0 |        | (GNA14/GNAQ)   |
| 6                          | rs17099213 | 21.6   | 3.93E-06         | -1.14    | 0.25   | 0.037   | 1     | C/T     | 85310294     | 3  | 1  | 0.8  | intron | WDR63          |
| 7                          | rs7923251  | 21.5   | 4.13E-06         | -0.22    | 0.05   | 0.037   | 10    | C/G     | 98212565     | 3  | 2  | 38.3 | intron | TLL2           |
| 8                          | rs17105700 | 21.3   | 4.40E-06         | -0.41    | 0.09   | 0.037   | 10    | A/G     | 125384794    | 4  | 2  | 7.5  |        | (GPR26)        |
| 9                          | rs6560608  | 20.9   | 5.40E-06         | -0.22    | 0.05   | 0.036   | 9     | C/T     | 79442234     | 1  | 3  | 38.5 | intron | GNA14          |
| 10                         | rs6667534  | 20.5   | 6.98E-06         | 0.27     | 0.06   | 0.042   | 1     | C/T     | 80642597     | 4  | 2  | 24.8 |        | (LOC100129325) |
| 11                         | rs1411855  | 20.4   | 7.24E-06         | -0.26    | 0.06   | 0.036   | 6     | A/C     | 66327875     | 3  | 4  | 20.3 | intron | EGFL11         |
| 12                         | rs2447409  | 20.4   | 7.43E-06         | 0.24     | 0.05   | 0.042   | 8     | A/G     | 140584954    | 2  | 4  | 35.7 |        | (KCNK9)        |
| 13                         | rs1006330  | 20.1   | 8.08E-06         | -0.25    | 0.06   | 0.036   | 11    | G/T     | 101131811    | 3  | 4  | 21.7 |        | (LOC100129471) |
| 14                         | rs1490800  | 20.0   | 8.64E-06         | -0.23    | 0.05   | 0.035   | 5     | A/G     | 67202303     | 2  | 4  | 27.0 |        | (PIK3R1)       |

\*rsName= SNP name; Fvalue=F test value; ProbF=p-value; Estimate=beta coefficient; StdErr=standard error; Rsquare=R square; Chrom=chromosome; bp= base pairs; A1=minor allele; MAF=Minor allele frequency (%); Role=role of the SNP; Hugo= gene name, if in parenthesis, then the SNP is located nearby gene(s)

**Supplemental Table 2.** The top ranked associations in HyperGEN whites for BP-factor.

| HyperGEN whites |            |        |                   |          |        |         |       |         |              |     |     |      |           |                |
|-----------------|------------|--------|-------------------|----------|--------|---------|-------|---------|--------------|-----|-----|------|-----------|----------------|
| No              | rsName     | FValue | ProbF<br>(n=1025) | Estimate | StdErr | RSquare | Chrom | Alleles | Position(bp) | AI1 | AI2 | MAF  | Role      | Hugo           |
| 1               | rs17031343 | 32.3   | 1.72E-08          | -0.61    | 0.11   | 0.033   | 3     | C/T     | 3445460      | 4   | 2   | 3.4  |           | (CRBN/IL5RA)   |
| 2               | rs10512418 | 23.2   | 1.65E-06          | 0.24     | 0.05   | 0.025   | 9     | C/T     | 133864464    | 2   | 4   | 18.1 | intron    | MED27          |
| 3               | rs872204   | 22.8   | 2.02E-06          | 0.23     | 0.05   | 0.025   | 18    | A/T     | 45824779     | 1   | 4   | 19.9 | intron    | MYO5B          |
| 4               | rs11136081 | 22.8   | 2.07E-06          | -0.29    | 0.06   | 0.024   | 8     | A/C     | 29491049     | 4   | 3   | 11.7 |           | (DUSP4)        |
| 5               | rs9379132  | 22.4   | 2.54E-06          | 0.23     | 0.05   | 0.024   | 6     | A/G     | 773403       | 4   | 2   | 21.4 |           | (EXOC2)        |
| 6               | rs899022   | 22.1   | 2.98E-06          | -0.20    | 0.04   | 0.024   | 10    | A/T     | 71063502     | 1   | 4   | 32.4 | near-gene | C10orf35       |
| 7               | rs1132075  | 22.0   | 3.17E-06          | -0.20    | 0.04   | 0.023   | 10    | A/G     | 71063031     | 1   | 3   | 32.3 | utr-3     | C10orf35       |
| 8               | rs604735   | 21.5   | 4.00E-06          | -0.18    | 0.04   | 0.023   | 1     | A/T     | 235441114    | 1   | 4   | 48.9 | intron    | RYR2           |
| 9               | rs844177   | 21.3   | 4.50E-06          | -0.19    | 0.04   | 0.023   | 5     | C/T     | 8425932      | 1   | 3   | 34.6 |           | (MTRR/SEMA5A)  |
| 10              | rs12140698 | 20.5   | 6.52E-06          | -0.28    | 0.06   | 0.023   | 1     | C/T     | 175713539    | 4   | 2   | 12.1 | intron    | LOC400796      |
| 11              | rs7244899  | 20.5   | 6.56E-06          | 0.22     | 0.05   | 0.022   | 18    | A/G     | 45808781     | 3   | 1   | 20.6 | intron    | MYO5B          |
| 12              | rs12455913 | 20.5   | 6.66E-06          | 0.22     | 0.05   | 0.023   | 18    | C/T     | 45811443     | 3   | 1   | 20.0 | intron    | MYO5B          |
| 13              | rs11672894 | 20.5   | 6.81E-06          | 0.19     | 0.04   | 0.022   | 19    | C/T     | 50493791     | 1   | 3   | 30.8 | intron    | MARK4          |
| 14              | rs12131748 | 20.2   | 7.58E-06          | -0.19    | 0.04   | 0.022   | 1     | C/T     | 175200403    | 2   | 4   | 29.3 | intron    | ASTN1          |
| 15              | rs2317222  | 20.2   | 7.71E-06          | 0.22     | 0.05   | 0.022   | 6     | A/G     | 778579       | 3   | 1   | 21.0 |           | (EXOC2)        |
| 16              | rs1781417  | 19.9   | 9.22E-06          | -1.63    | 0.37   | 0.021   | 1     | C/T     | 149974389    | 1   | 3   | 0.3  |           | (LOC100270670) |
| 17              | rs2710244  | 19.7   | 9.85E-06          | 0.18     | 0.04   | 0.022   | 7     | C/T     | 152415484    | 2   | 4   | 40.1 |           | (ACTR3B)       |
| 18              | rs453202   | 19.7   | 9.99E-06          | 0.19     | 0.04   | 0.021   | 5     | G/T     | 126883404    | 2   | 1   | 35.3 | intron    | PRRC1          |

\*rsName= SNP name; Fvalue=F test value; ProbF=p-value; Estimate=beta coefficient; StdErr=standard error; Rsquare=R square; Chrom=chromosome; bp= base pairs; AI1-minor allele; MAF=Minor allele frequency (%); Role=role of the SNP; Hugo= gene name, if in parenthesis, then the SNP is located nearby gene(s)

**Supplemental Table 3.** Blood pressure/ hypertension large GWAS results

| No | Reported Gene                                | Associated SNPs | Region   | Disease_Trait             | Strongest SNP Risk Allele | Risk allele frequency | P_Value  | Trait Change                     | Initial_Sample_Size      | Replication_Sample_Size            | PUBMEDID |
|----|----------------------------------------------|-----------------|----------|---------------------------|---------------------------|-----------------------|----------|----------------------------------|--------------------------|------------------------------------|----------|
| 1  | ACE                                          | rs4343          | 17q23.3  | Angiotensin-converting en | rs4343-G                  | 0.31                  | 3.00E-25 | [NR] % variance                  | 400 Han Chinese hyperten | 623 Han Chinese hypertensives      | 20066004 |
| 2  | ABO                                          | rs495828        | 9q34.2   | Angiotensin-converting en | rs495828-A                | 0.17                  | 3.00E-08 | [NR] % variance                  | 400 Han Chinese hyperten | 623 Han Chinese hypertensives      | 20066004 |
| 3  | ADH7                                         | rs991316        | 4q23     | Hypertension              | rs991316-T                | 0.45                  | 5.00E-06 | [NR]                             | 509 African American cas | 366 West African cases, 614 West A | 19609347 |
| 4  | ALDH1A2                                      | rs1550576       | 15q22.1  | Hypertension              | rs1550576-?               | 0.86                  | 3.00E-06 | [NR]                             | 509 African American cas | 366 West African cases, 614 West A | 19609347 |
| 5  | SLC24A4                                      | rs11160059      | 14q32.12 | Systolic blood pressure   | rs11160059-?              | 0.08                  | 1.54E-08 | [NR]                             | 509 African American cas | 366 West African cases, 614 West A | 19609347 |
| 6  | CSK, ULK3                                    | rs6495122       | 15q24.1  | Diastolic blood pressure  | rs6495122-A               | 0.42                  | 2.00E-10 | [0.28-0.52] mm Hg increase       | 29,136 individuals       | 34,433 individuals                 | 19430479 |
| 7  | ULK4                                         | rs9815354       | 3p22.1   | Diastolic blood pressure  | rs9815354-A               | 0.17                  | 3.00E-09 | [0.33-0.65] mm Hg increase       | 29,136 individuals       | 34,433 individuals                 | 19430479 |
| 8  | SH2B3                                        | rs3184504       | 12q24.12 | Diastolic blood pressure  | rs3184504-T               | 0.48                  | 3.00E-14 | [0.36-0.60] mm Hg increase       | 29,136 individuals       | 34,433 individuals                 | 19430479 |
| 9  | TBX3, TBX5                                   | rs2384550       | 12q24.21 | Diastolic blood pressure  | rs2384550-A               | 0.35                  | 4.00E-08 | [0.23-0.47] mm Hg decrease       | 29,136 individuals       | 34,433 individuals                 | 19430479 |
| 10 | PLEKHA7                                      | rs11024074      | 11p15.1  | Diastolic blood pressure  | rs11024074-T              | 0.72                  | 1.00E-06 | [0.19-0.47] mm Hg decrease       | 29,136 individuals       | 34,433 individuals                 | 19430479 |
| 11 | ATP2B1                                       | rs2681472       | 12q21.33 | Diastolic blood pressure  | rs2681472-A               | 0.83                  | 1.00E-09 | [0.34-0.66] mm Hg increase       | 29,136 individuals       | 34,433 individuals                 | 19430479 |
| 12 | CACNB2                                       | rs11014166      | 10p12.33 | Diastolic blood pressure  | rs11014166-A              | 0.66                  | 1.00E-08 | [0.25-0.49] mm Hg increase       | 29,136 individuals       | 34,433 individuals                 | 19430479 |
| 13 | CACNB2                                       | rs11014166      | 10p12.33 | Hypertension              | rs11014166-A              | 0.66                  | 6.00E-08 | [0.05-0.13] increase in log odds | 29,136 individuals       | 34,433 individuals                 | 19430479 |
| 14 | MSRA                                         | rs11775334      | 8p23.1   | Hypertension              | rs11775334-A              | 0.32                  | 4.00E-06 | [0.04-0.12] increase in log odds | 29,136 individuals       | 34,433 individuals                 | 19430479 |
| 15 | ZNF831, EDN3                                 | rs16982520      | 20q13.32 | Hypertension              | rs16982520-A              | 0.88                  | 2.00E-07 | [0.09-0.17] decrease in log odds | 29,136 individuals       | 34,433 individuals                 | 19430479 |
| 16 | ATP2B1                                       | rs2681472       | 12q21.33 | Hypertension              | rs2681472-A               | 0.83                  | 2.00E-11 | [0.11-0.19] increase in log odds | 29,136 individuals       | 34,433 individuals                 | 19430479 |
| 17 | CACNB2                                       | rs11014166      | 10p12.33 | Systolic blood pressure   | rs11014166-A              | 0.66                  | 7.00E-07 | [0.30-0.70] mm Hg increase       | 29,136 individuals       | 34,433 individuals                 | 19430479 |
| 18 | CASZ1                                        | rs12046278      | 1p36.22  | Systolic blood pressure   | rs12046278-T              | 0.64                  | 5.00E-06 | [0.29-0.77] mm Hg decrease       | 29,136 individuals       | 34,433 individuals                 | 19430479 |
| 19 | SH2B3                                        | rs3184504       | 12q24.12 | Systolic blood pressure   | rs3184504-T               | 0.48                  | 5.00E-09 | [0.38-0.78] mm Hg increase       | 29,136 individuals       | 34,433 individuals                 | 19430479 |
| 20 | CYP17A1                                      | rs1004467       | 10q24.32 | Systolic blood pressure   | rs1004467-A               | 0.9                   | 1.00E-10 | [0.74-1.36] mm Hg increase       | 29,136 individuals       | 34,433 individuals                 | 19430479 |
| 21 | PLEKHA7                                      | rs381815        | 11p15.1  | Systolic blood pressure   | rs381815-T                | 0.26                  | 2.00E-09 | [0.43-0.87] mm Hg increase       | 29,136 individuals       | 34,433 individuals                 | 19430479 |
| 22 | MDS1                                         | rs448378        | 3q26.2   | Systolic blood pressure   | rs448378-A                | 0.52                  | 1.00E-07 | [0.31-0.71] mm Hg decrease       | 29,136 individuals       | 34,433 individuals                 | 19430479 |
| 23 | ATP2B1                                       | rs2681492       | 12q21.33 | Systolic blood pressure   | rs2681492-T               | 0.8                   | 4.00E-11 | [0.60-1.10] mm Hg increase       | 29,136 individuals       | 34,433 individuals                 | 19430479 |
| 24 | FGF5, PRDM8, c4orf22                         | rs16998073      | 4q21.21  | Diastolic blood pressure  | rs16998073-T              | 0.21                  | 1.00E-21 | [0.40-0.60] mm Hg increase       | 34,433 individuals       | Up to 100,347 white individuals, u | 19430483 |
| 25 | CYP11A1, CYP11A2, CSK, LMAN1L, CPLX3, ARID3B | rs1378942       | 15q24.1  | Diastolic blood pressure  | rs1378942-C               | 0.36                  | 1.00E-23 | [0.35-0.51] mm Hg increase       | 34,433 individuals       | Up to 100,347 white individuals, u | 19430483 |
| 26 | ZNF652, PHB                                  | rs16948048      | 17q21.32 | Diastolic blood pressure  | rs16948048-G              | 0.39                  | 5.00E-09 | [0.21-0.41] mm Hg increase       | 34,433 individuals       | Up to 100,347 white individuals, u | 19430483 |
| 27 | c10orf107, TMEM26, RTKN2, RHOBTB1, ARID5B    | rs1530440       | 10q21.2  | Diastolic blood pressure  | rs1530440-T               | 0.19                  | 1.00E-09 | [0.27-0.51] mm Hg decrease       | 34,433 individuals       | Up to 100,347 white individuals, u | 19430483 |

**Supplemental Table 3 (Continued).** Blood pressure/ hypertension large GWAS results

| No | Reported Gene                      | Associated SNPs              | Region   | Disease_Trait                              | Strongest SNP Risk Allele | Risk allele frequency | P_Value  | Trait Change                          | Initial_Sample_Size                                        | Replication_Sample_Size             | PUBMEDID |
|----|------------------------------------|------------------------------|----------|--------------------------------------------|---------------------------|-----------------------|----------|---------------------------------------|------------------------------------------------------------|-------------------------------------|----------|
| 28 | MDS1                               | rs1918974                    | 3q26.2   | Diastolic blood pressure                   | rs1918974-T               | 0.54                  | 8.00E-08 | [0.17-0.37] mm Hg decrease            | 34,433 individuals                                         | Up to 100,347 white individuals, ur | 19430483 |
| 29 | ATXN2, SH2B3                       | rs653178                     | 12q24.12 | Diastolic blood pressure                   | rs653178-T                | 0.53                  | 3.00E-18 | [0.36-0.56] mm Hg decrease            | 34,433 individuals                                         | Up to 100,347 white individuals, ur | 19430483 |
| 30 | MTHFR, NPPA, CLCN6, NPPB, AGTRAP   | rs17367504                   | 1p36.22  | Systolic blood pressure                    | rs17367504-G              | 0.14                  | 2.00E-13 | [0.63-1.07] mm Hg decrease            | 34,433 individuals                                         | Up to 100,347 white individuals, ur | 19430483 |
| 31 | CYP17A1, AS3MT, CNM2, NT5C2        | rs11191548                   | 10q24.32 | Systolic blood pressure                    | rs11191548-T              | 0.91                  | 7.00E-24 | [0.92-1.40] mm Hg increase            | 34,433 individuals                                         | Up to 100,347 white individuals, ur | 19430483 |
| 32 | PLCD3, ACBD4, HEXIM1, HEXIM2       | rs12946454                   | 17q21.31 | Systolic blood pressure                    | rs12946454-T              | 0.28                  | 1.00E-08 | [0.37-0.77] mm Hg increase            | 34,433 individuals                                         | Up to 100,347 white individuals, ur | 19430483 |
| 33 | LOC344371, MYADML, FAM98A, RASGRP3 | rs9308945,rs6711736,rs2p22.3 | 2p22.3   | Hypertension (young onset 4-SNP-haplotype  | NR                        | NR                    | 3.00E-10 | NR                                    | 175 Han Chinese cases, 17833 Han Chinese cases, 833 Han Ch | 19421330                            |          |
| 34 | LOC644502                          | rs12110693                   | 6q22.31  | Quantitative traits                        | rs12110693-A              | 0.49                  | 2.00E-09 | [0.45-0.87] beats per minute increase | 8,842 Korean individuals                                   | 7,861 Korean individuals            | 19396169 |
| 35 | ATP2B1                             | rs17249754                   | 12q21.33 | Quantitative traits                        | rs17249754-A              | 0.37                  | 1.00E-07 | [0.67-1.45] mm Hg decrease            | 8,842 Korean individuals                                   | 7,861 Korean individuals            | 19396169 |
| 36 | ATP2B1                             | rs17249754                   | 12q21.33 | Quantitative traits                        | rs17249754-A              | 0.37                  | 3.00E-06 | [0.37-0.89] mm Hg decrease            | 8,842 Korean individuals                                   | 7,861 Korean individuals            | 19396169 |
| 37 | CD46, LOC148696                    | rs12731740                   | 1q32.2   | Quantitative traits                        | rs12731740-T              | 0.1                   | 3.00E-09 | [0.72-1.44] beats per minute increase | 8,842 Korean individuals                                   | 7,861 Korean individuals            | 19396169 |
| 38 | CDH13                              | rs11646213                   | 16q23.3  | Hypertension                               | rs11646213-T              | 0.6                   | 8.00E-06 | [1.15-1.43]                           | 364 cases, 590 controls                                    | 1,043 cases, 1,769 controls         | 19304780 |
| 39 | CACNB2                             | rs7069923                    | 10p12.33 | Quantitative traits                        | rs7069923-C               | 0.49                  | 1.00E-06 | [NR] mm Hg increase                   | Up to 2,906 Micronesian ii                                 | NR                                  | 19197348 |
| 40 | Intergenic                         | rs254893                     | 5q35.1   | Quantitative traits                        | rs254893-A                | 0.06                  | 6.00E-06 | [NR] mm Hg decrease                   | Up to 2,906 Micronesian ii                                 | NR                                  | 19197348 |
| 41 | UBE3C                              | rs2527866                    | 7q36.3   | Quantitative traits                        | rs2527866-C               | 0.23                  | 3.00E-06 | [NR] mm Hg decrease                   | Up to 2,906 Micronesian ii                                 | NR                                  | 19197348 |
| 42 | CUBN                               | rs10508517                   | 10p13    | Quantitative traits                        | rs10508517-A              | 0.43                  | 6.00E-06 | [NR] mm Hg decrease                   | Up to 2,906 Micronesian ii                                 | NR                                  | 19197348 |
| 43 | STK39                              | rs6749447                    | 2q24.3   | Blood pressure                             | rs6749447-G               | 0.28                  | 2.00E-07 | [1.2-2.6] mm Hg increase in DBP       | 542 individuals                                            | 6,583 individuals                   | 19114657 |
| 44 | LYZ, YEATS4, FRS2                  | rs317689,rs315135,rs7212q15  | 12q15    | Response to diuretic therap3-SNP haplotype | NR                        | NR                    | 6.00E-06 | NR                                    | 194 blacks, 195 whites                                     | NR                                  | 18591461 |
| 45 | Intergenic                         | rs1963982                    | 8q13.3   | Blood pressure                             | rs1963982-?               | NR                    | 3.00E-06 | NR                                    | 644-1,327 individuals, de                                  | NR                                  | 17903302 |
| 46 | CAMK4                              | rs10491334                   | 5q22.1   | Blood pressure                             | rs10491334-?              | NR                    | 4.00E-06 | NR                                    | 644-1,327 individuals, de                                  | NR                                  | 17903302 |
| 47 | CDH13                              | rs3096277                    | 16q23.3  | Blood pressure                             | rs3096277-?               | NR                    | 1.00E-09 | NR                                    | 644-1,327 individuals, de                                  | NR                                  | 17903302 |
| 48 | Intergenic                         | rs2509458                    | 6q15     | Blood pressure                             | rs2509458-?               | NR                    | 7.00E-06 | NR                                    | 644-1,327 individuals, de                                  | NR                                  | 17903302 |
| 49 | CNTN4                              | rs4370013                    | 3p26.3   | Blood pressure                             | rs4370013-?               | NR                    | 4.00E-06 | NR                                    | 644-1,327 individuals, de                                  | NR                                  | 17903302 |
| 50 | CCL20, WDR69                       | rs7591163                    | 2q36.3   | Blood pressure                             | rs7591163-?               | NR                    | 3.00E-07 | NR                                    | 644-1,327 individuals, de                                  | NR                                  | 17903302 |
| 51 | Intergenic                         | rs10493340                   | 1p31.3   | Blood pressure                             | rs10493340-?              | NR                    | 2.00E-06 | NR                                    | 644-1,327 individuals, de                                  | NR                                  | 17903302 |
| 52 | Intergenic                         | rs935334                     | 14q24.3  | Blood pressure                             | rs935334-?                | NR                    | 3.00E-06 | NR                                    | 644-1,327 individuals, de                                  | NR                                  | 17903302 |
| 53 | C14orf118                          | rs2121070                    | 14q24.3  | Blood pressure                             | rs2121070-?               | NR                    | 5.00E-06 | NR                                    | 644-1,327 individuals, de                                  | NR                                  | 17903302 |
| 54 | RYR2,CHRM3,ZP4                     | rs2820037                    | 1q43     | Hypertension                               | rs2820037-T               | 0.14                  | 8.00E-07 | [1.03-2.31]                           | 1,952 cases,2,938 controls                                 | NR                                  | 17554300 |
| 55 | Intergenic                         | rs2398162                    | 15q26.2  | Hypertension                               | rs2398162-A               | 0.74                  | 6.00E-06 | [1.03-1.67]                           | 1,952 cases,2,938 controls                                 | NR                                  | 17554300 |

*Footnote:* More recent information on GWAS of BP is available from Hindorff LA, Junkins HA, Hall PN, Mehta JP, and Manolio TA.

A Catalog of Published Genome-Wide Association Studies, at: [www.genome.gov/gwastudies](http://www.genome.gov/gwastudies).

**Supplemental Table 4.** Cardiovascular disease large studies GWAS results

| No | Reported Gene | Associated SNPs | Region   | Disease_Trait                    | Trait | Strongest SNP Risk Allele | Risk allele frequency | P_Value  | Initial_Sampl    | Replication_Sam | PUBMEDID | First Author |
|----|---------------|-----------------|----------|----------------------------------|-------|---------------------------|-----------------------|----------|------------------|-----------------|----------|--------------|
| 1  | GJA1          | rs9398652       | 6q22.31  | Resting heart rate               |       | rs9398652-A               | 0.1                   | 4.00E-15 | 38,991 European  | NR              | 20639392 | Eijgelsheim  |
| 2  | MYH6          | rs452036        | 14q11.2  | Resting heart rate               |       | rs452036-A                | 0.36                  | 4.00E-14 | 38,991 European  | NR              | 20639392 | Eijgelsheim  |
| 3  | MYH7,NDNG     | rs223116        | 14q11.2  | Resting heart rate               |       | rs223116-A                | 0.24                  | 3.00E-08 | 38,991 European  | NR              | 20639392 | Eijgelsheim  |
| 4  | Intergenic    | rs17287293      | 12p12.1  | Resting heart rate               |       | rs17287293-G              | 0.15                  | 2.00E-10 | 38,991 European  | NR              | 20639392 | Eijgelsheim  |
| 5  | CD34          | rs2745967       | 1q32.2   | Resting heart rate               |       | rs2745967-G               | 0.37                  | 7.00E-08 | 38,991 European  | NR              | 20639392 | Eijgelsheim  |
| 6  | SLC35F1       | rs281868        | 6q22.31  | Resting heart rate               |       | rs281868-G                | 0.5                   | 4.00E-10 | 38,991 European  | NR              | 20639392 | Eijgelsheim  |
| 7  | SLC12A9       | rs314370        | 7q22.1   | Resting heart rate               |       | rs314370-C                | 0.19                  | 6.00E-10 | 38,991 European  | NR              | 20639392 | Eijgelsheim  |
| 8  | Ufsp1         | rs12666989      | 7q22.1   | Resting heart rate               |       | rs12666989-C              | 0.18                  | 2.00E-08 | 38,991 European  | NR              | 20639392 | Eijgelsheim  |
| 9  | FADS1         | rs174547        | 11q12.2  | Resting heart rate               |       | rs174547-C                | 0.33                  | 2.00E-09 | 38,991 European  | NR              | 20639392 | Eijgelsheim  |
| 10 | GJA1          | rs11154022      | 6q22.31  | Resting heart rate               |       | rs11154022-A              | 0.33                  | 7.00E-08 | 38,991 European  | NR              | 20639392 | Eijgelsheim  |
| 11 | TBC1D4        | rs548097        | 13q22.2  | Heart failure                    | (EA)  | rs548097-?                | 0.02                  | 6.00E-07 | 20,926 European  | NR              | 20445134 | Smith        |
| 12 | GNAI5         | rs11880198      | 19p13.3  | Heart failure                    | (EA)  | rs11880198-?              | 0.13                  | 6.00E-06 | 20,926 European  | NR              | 20445134 | Smith        |
| 13 | LOC100129376  | rs11118620      | 1q41     | Heart failure                    | (EA)  | rs11118620-?              | 0.29                  | 7.00E-06 | 20,926 European  | NR              | 20445134 | Smith        |
| 14 | BCHE          | rs1523288       | 3q26.1   | Heart failure                    | (EA)  | rs1523288-?               | 0.65                  | 6.00E-06 | 20,926 European  | NR              | 20445134 | Smith        |
| 15 | PRICKLE1      | rs1520832       | 12q12    | Heart failure                    | (EA)  | rs1520832-?               | 0.04                  | 1.00E-06 | 20,926 European  | NR              | 20445134 | Smith        |
| 16 | LOC339760     | rs13418717      | 2q14.3   | Heart failure                    | (AA)  | rs13418717-?              | 0.2                   | 3.00E-06 | 20,926 European  | NR              | 20445134 | Smith        |
| 17 | SH3GL2        | rs2210327       | 9p22.2   | Heart failure                    | (AA)  | rs2210327-?               | 0.19                  | 7.00E-07 | 20,926 European  | NR              | 20445134 | Smith        |
| 18 | RPUSD4        | rs563519        | 11q24.2  | Heart failure                    | (AA)  | rs563519-?                | 0.66                  | 3.00E-06 | 20,926 European  | NR              | 20445134 | Smith        |
| 19 | TMTC1         | rs2046383       | 12p11.22 | Heart failure                    | (AA)  | rs2046383-?               | 0.3                   | 3.00E-06 | 20,926 European  | NR              | 20445134 | Smith        |
| 20 | BTG1          | rs17019682      | 12q21.33 | Heart failure                    | (AA)  | rs17019682-?              | 0.17                  | 2.00E-06 | 20,926 European  | NR              | 20445134 | Smith        |
| 21 | USP3          | rs10519210      | 15q22.31 | Heart failure                    | (EA)  | rs10519210-?              | 0.03                  | 1.00E-08 | 20,926 European  | NR              | 20445134 | Smith        |
| 22 | LRIG3         | rs11172782      | 12q14.1  | Heart failure                    | (AA)  | rs11172782-?              | 0.29                  | 7.00E-08 | 20,926 European  | NR              | 20445134 | Smith        |
| 23 | EVX1          | rs13225783      | 7p15.2   | Heart failure                    | (EA)  | rs13225783-?              | 0.05                  | 7.00E-06 | 20,926 European  | NR              | 20445134 | Smith        |
| 24 | SNX16         | rs6473383       | 8q21.13  | Heart failure                    | (EA)  | rs6473383-?               | 0.15                  | 3.00E-06 | 20,926 European  | NR              | 20445134 | Smith        |
| 25 | MOBKL2B       | rs10812610      | 9p21.2   | Heart failure                    | (EA)  | rs10812610-?              | 0.5                   | 5.00E-06 | 20,926 European  | NR              | 20445134 | Smith        |
| 26 | CH25H         | rs11203032      | 10q23.31 | Heart failure                    | (EA)  | rs11203032-?              | 0.1                   | 8.00E-06 | 20,926 European  | NR              | 20445134 | Smith        |
| 27 | CMTM7         | rs12638540      | 3p22.3   | Mortality among heart failure p: | (EA)  | rs12638540-G              | 0.043                 | 3.00E-07 | 2,526 European a | NR              | 20400778 | Morrison     |
| 28 | LPHN1         | rs4528684       | 19p13.12 | Mortality among heart failure p: | (EA)  | rs4528684-T               | 0.094                 | 1.00E-06 | 2,526 European a | NR              | 20400778 | Morrison     |
| 29 | OTUD7A        | rs2125623       | 15q13.3  | Mortality among heart failure p: | (EA)  | rs2125623-C               | 0.71                  | 1.00E-06 | 2,526 European a | NR              | 20400778 | Morrison     |
| 30 | LOC338797     | rs7965445       | 12q24.33 | Mortality among heart failure p: | (EA)  | rs7965445-A               | 0.098                 | 2.00E-06 | 2,526 European a | NR              | 20400778 | Morrison     |
| 31 | GPM6A         | rs7687921       | 4q34.2   | Mortality among heart failure p: | (EA)  | rs7687921-T               | 0.039                 | 4.00E-06 | 2,526 European a | NR              | 20400778 | Morrison     |
| 32 | LOC400804     | rs12733856      | 1q41     | Mortality among heart failure p: | (AA)  | rs12733856-A              | 0.382                 | 3.00E-06 | 2,526 European a | NR              | 20400778 | Morrison     |
| 33 | IFRD1         | rs17159640      | 7q31.1   | Mortality among heart failure p: | (EA)  | rs17159640-T              | 0.048                 | 9.00E-06 | 2,526 European a | NR              | 20400778 | Morrison     |
| 34 | ADAMTS12      | rs6868223       | 5p13.3   | Mortality among heart failure p: | (AA)  | rs6868223-A               | 0.338                 | 2.00E-06 | 2,526 European a | NR              | 20400778 | Morrison     |
| 35 | KCNK13        | rs8017423       | 14q32.11 | Mortality among heart failure p: | (AA)  | rs8017423-T               | 0.62                  | 7.00E-06 | 2,526 European a | NR              | 20400778 | Morrison     |
| 36 | KCNMA1        | rs4979906       | 10q22.3  | Mortality among heart failure p: | (EA)  | rs4979906-G               | 0.186                 | 7.00E-06 | 2,526 European a | NR              | 20400778 | Morrison     |
| 37 | PARVA         | rs7120489       | 11p15.3  | Mortality among heart failure p: | (EA)  | rs7120489-A               | 0.069                 | 7.00E-06 | 2,526 European a | NR              | 20400778 | Morrison     |

**Supplemental Table 4 (Continued).** Cardiovascular disease large studies GWAS results

| No | Reported Gene   | Associated SNPs | Region   | Disease_Trait               | Trait          | Strongest SNP Risk Allele | Risk allele frequency | P_Value  | Initial_Sampl      | Replication_Sampl       | PUBMEDID | First Author |
|----|-----------------|-----------------|----------|-----------------------------|----------------|---------------------------|-----------------------|----------|--------------------|-------------------------|----------|--------------|
| 38 | KCNN3           | rs13376333      | 1q21.3   | Atrial fibrillation         |                | rs13376333-T              | 0.3                   | 2.00E-21 | 1,335 European d   | 1,164 European descei   | 20173747 | Ellinor      |
| 39 | NR              | rs13038095      | 20q13.13 | Atrial fibrillation         |                | rs13038095-?              | NR                    | 2.00E-07 | 1,335 European d   | 1,164 European descei   | 20173747 | Ellinor      |
| 40 | PITX2           | rs6843082       | 4q25     | Atrial fibrillation         |                | rs6843082-G               | 0.26                  | 3.00E-28 | 1,335 European d   | 1,164 European descei   | 20173747 | Ellinor      |
| 41 | KCNH2           | rs4725982       | 7q36.1   | Electrocardiographic traits | (QTc interval) | rs4725982-A               | NR                    | 3.00E-06 | 6,543 Indian Asiai | 6,243 Indian Asians, 5, | 20062061 | Chambers     |
| 42 | NOS1AP          | rs1415259       | 1q23.3   | Electrocardiographic traits | (QTc interval) | rs1415259-A               | 0.39                  | 7.00E-10 | 6,543 Indian Asiai | 6,243 Indian Asians, 5, | 20062061 | Chambers     |
| 43 | SCN10A          | rs6795970       | 3p22.2   | Electrocardiographic traits | (PR interval)  | rs6795970-A               | 0.36                  | 3.00E-15 | 6,543 Indian Asiai | 6,243 Indian Asians, 5, | 20062061 | Chambers     |
| 44 | DKK1            | rs1733724       | 10q21.1  | Electrocardiographic traits | (QRS duration) | rs1733724-T               | 0.21                  | 7.00E-08 | Up to 12,670 Icela | Up to 10,352 Icelandic  | 20062063 | Holm         |
| 45 | ARHGAP24        | rs7660702       | 4q21.23  | Electrocardiographic traits | (PR interval)  | rs7660702-T               | 0.74                  | 3.00E-17 | Up to 12,670 Icela | Up to 10,352 Icelandic  | 20062063 | Holm         |
| 46 | MYH6            | rs365990        | 14q11.2  | Electrocardiographic traits | (HR)           | rs365990-G                | 0.34                  | 9.00E-11 | Up to 12,670 Icela | Up to 10,352 Icelandic  | 20062063 | Holm         |
| 47 | SCN10A          | rs6795970       | 3p22.2   | Electrocardiographic traits | (QRS duration) | rs6795970-A               | 0.36                  | 4.00E-09 | Up to 12,670 Icela | Up to 10,352 Icelandic  | 20062063 | Holm         |
| 48 | CAV1            | rs3807989       | 7q31.2   | Electrocardiographic traits | (PR interval)  | rs3807989-A               | 0.4                   | 7.00E-13 | Up to 12,670 Icela | Up to 10,352 Icelandic  | 20062063 | Holm         |
| 49 | KCNE1           | rs727957        | 21q22.12 | Electrocardiographic traits | (QT interval)  | rs727957-T                | 0.19                  | 2.00E-12 | Up to 12,670 Icela | Up to 10,352 Icelandic  | 20062063 | Holm         |
| 50 | CDKN1A          | rs1321311       | 6p21.2   | Electrocardiographic traits | (QRS duration) | rs1321311-T               | 0.21                  | 3.00E-10 | Up to 12,670 Icela | Up to 10,352 Icelandic  | 20062063 | Holm         |
| 51 | TBX5            | rs3825214       | 12q24.21 | Electrocardiographic traits | (QRS duration) | rs3825214-G               | 0.22                  | 3.00E-13 | Up to 12,670 Icela | Up to 10,352 Icelandic  | 20062063 | Holm         |
| 52 | SCN5A           | rs11129795      | 3p22.2   | Electrocardiographic traits | (QRS complex)  | rs11129795-G              | 0.77                  | 5.00E-10 | Up to 12,670 Icela | Up to 10,352 Icelandic  | 20062063 | Holm         |
| 53 | SCN10A          | rs6795970       | 3p22.2   | Electrocardiographic traits | (PR interval)  | rs6795970-A               | 0.36                  | 1.00E-58 | Up to 12,670 Icela | Up to 10,352 Icelandic  | 20062063 | Holm         |
| 54 | NDRG4           | rs37062         | 16q21    | Electrocardiographic traits | (QT interval)  | rs37062-A                 | 0.72                  | 1.00E-06 | Up to 12,670 Icela | Up to 10,352 Icelandic  | 20062063 | Holm         |
| 55 | KCNQ1           | rs12296050      | 11p15.5  | Electrocardiographic traits | (QT interval)  | rs12296050-T              | 0.15                  | 8.00E-11 | Up to 12,670 Icela | Up to 10,352 Icelandic  | 20062063 | Holm         |
| 56 | KCNH2           | rs3807375       | 7q36.1   | Electrocardiographic traits | (QT interval)  | rs3807375-T               | 0.35                  | 5.00E-11 | Up to 12,670 Icela | Up to 10,352 Icelandic  | 20062063 | Holm         |
| 57 | NOS1AP          | rs10494366      | 1q23.3   | Electrocardiographic traits | (QT interval)  | rs10494366-G              | 0.39                  | 5.00E-22 | Up to 12,670 Icela | Up to 10,352 Icelandic  | 20062063 | Holm         |
| 58 | SCN5A           | rs12053903      | 3p22.2   | Electrocardiographic traits | (PR interval)  | rs12053903-T              | 0.72                  | 1.00E-07 | Up to 12,670 Icela | Up to 10,352 Icelandic  | 20062063 | Holm         |
| 59 | TBX5            | rs3825214       | 12q24.21 | Electrocardiographic traits | (QT interval)  | rs3825214-G               | 0.22                  | 1.00E-07 | Up to 12,670 Icela | Up to 10,352 Icelandic  | 20062063 | Holm         |
| 60 | TBX5            | rs3825214       | 12q24.21 | Electrocardiographic traits | (PR interval)  | rs3825214-G               | 0.22                  | 3.00E-12 | Up to 12,670 Icela | Up to 10,352 Icelandic  | 20062063 | Holm         |
| 61 | CAV1, CAV2      | rs3807989       | 7q31.2   | PR interval                 |                | rs3807989-A               | 0.4                   | 4.00E-28 | 28,517 European    | NR                      | 20062060 | Pfeufer      |
| 62 | NKX2-5, C5orf41 | rs251253        | 5q35.1   | PR interval                 |                | rs251253-C                | 0.4                   | 9.00E-13 | 28,517 European    | NR                      | 20062060 | Pfeufer      |
| 63 | TBX5, TBX3      | rs1896312       | 12q24.21 | PR interval                 |                | rs1896312-C               | 0.28                  | 3.00E-17 | 28,517 European    | NR                      | 20062060 | Pfeufer      |
| 64 | SOX5, C12orf67  | rs11047543      | 12p12.1  | PR interval                 |                | rs11047543-A              | 0.15                  | 3.00E-13 | 28,517 European    | NR                      | 20062060 | Pfeufer      |
| 65 | MEIS1           | rs11897119      | 2p14     | PR interval                 |                | rs11897119-C              | 0.39                  | 5.00E-11 | 28,517 European    | NR                      | 20062060 | Pfeufer      |
| 66 | WNT11           | rs4944092       | 11q13.5  | PR interval                 |                | rs4944092-G               | 0.32                  | 3.00E-08 | 28,517 European    | NR                      | 20062060 | Pfeufer      |
| 67 | SCN10A          | rs6800541       | 3p22.2   | PR interval                 |                | rs6800541-C               | 0.4                   | 2.00E-74 | 28,517 European    | NR                      | 20062060 | Pfeufer      |
| 68 | ARHGAP24        | rs7692808       | 4q21.23  | PR interval                 |                | rs7692808-A               | 0.31                  | 6.00E-20 | 28,517 European    | NR                      | 20062060 | Pfeufer      |
| 69 | SCN5A           | rs11708996      | 3p22.2   | PR interval                 |                | rs11708996-C              | 0.15                  | 6.00E-26 | 28,517 European    | NR                      | 20062060 | Pfeufer      |

**Supplemental Table 4 (Continued).** Cardiovascular disease large studies GWAS results

| No  | Reported Gene | Associated SNPs | Region   | Disease_Trait            | Trait | Strongest SNP Risk Allele | Risk allele frequency | P_Value  | Initial_Sampl                             | Replication_Sam | PUBMEDID | First Author |
|-----|---------------|-----------------|----------|--------------------------|-------|---------------------------|-----------------------|----------|-------------------------------------------|-----------------|----------|--------------|
| 70  | TTN           | rs12476289      | 2q31.2   | QT interval              |       | rs12476289-A              | 0.07                  | 2.00E-06 | 2,325                                     | European ir NR  | 20031603 | Marroni      |
| 71  | Intergenic    | rs7601713       | 2q24.1   | QT interval              |       | rs7601713-A               | 0.23                  | 2.00E-06 | 2,325                                     | European ir NR  | 20031603 | Marroni      |
| 72  | PDE3A         | rs1348582       | 12p12.2  | QT interval              |       | rs1348582-G               | 0.18                  | 1.00E-06 | 2,325                                     | European ir NR  | 20031603 | Marroni      |
| 73  | ELMO1         | rs10488031      | 7p14.2   | QT interval              |       | rs10488031-A              | 0.07                  | 2.00E-06 | 2,325                                     | European ir NR  | 20031603 | Marroni      |
| 74  | NOS1AP        | rs2880058       | 1q23.3   | QT interval              |       | rs2880058-G               | 0.32                  | 2.00E-10 | 2,325                                     | European ir NR  | 20031603 | Marroni      |
| 75  | TCL6          | rs8015016       | 14q32.13 | QT interval              |       | rs8015016-G               | 0.2                   | 5.00E-07 | 2,325                                     | European ir NR  | 20031603 | Marroni      |
| 76  | LOC100132805  | rs789852        | 3q29     | QT interval              |       | rs789852-A                | 0.08                  | 7.00E-07 | 2,325                                     | European ir NR  | 20031603 | Marroni      |
| 77  | PTPRG         | rs652889        | 3p14.2   | QT interval              |       | rs652889-A                | 0.36                  | 8.00E-07 | 2,325                                     | European ir NR  | 20031603 | Marroni      |
| 78  | Intergenic    | rs7728043       | 5p15.32  | QT interval              |       | rs7728043-G               | 0.48                  | 1.00E-06 | 2,325                                     | European ir NR  | 20031603 | Marroni      |
| 79  | Intergenic    | rs2478333       | 13q14.2  | QT interval              |       | rs2478333-A               | 0.33                  | 4.00E-08 | 2,325                                     | European ir NR  | 20031603 | Marroni      |
| 80  | Intergenic    | rs2650951       | 3q21.1   | QT interval              |       | rs2650951-A               | 0.05                  | 1.00E-06 | 2,325                                     | European ir NR  | 20031603 | Marroni      |
| 81  | Intergenic    | rs1533317       | 4p15.1   | QT interval              |       | rs1533317-A               | 0.46                  | 2.00E-06 | 2,325                                     | European ir NR  | 20031603 | Marroni      |
| 82  | ARHGAP10      | rs6845865       | 4q31.23  | QT interval              |       | rs6845865-G               | 0.21                  | 7.00E-07 | 2,325                                     | European ir NR  | 20031603 | Marroni      |
| 83  | Intergenic    | rs4318720       | 4q26     | QT interval              |       | rs4318720-A               | 0.09                  | 8.00E-07 | 2,325                                     | European ir NR  | 20031603 | Marroni      |
| 84  | Intergenic    | rs744016        | 22q12.1  | RR interval (heart rate) |       | rs744016-A                | 0.2                   | 5.00E-06 | 2,325                                     | European ir NR  | 20031603 | Marroni      |
| 85  | Intergenic    | rs1024020       | 4q28.3   | RR interval (heart rate) |       | rs1024020-A               | 0.21                  | 4.00E-07 | 2,325                                     | European ir NR  | 20031603 | Marroni      |
| 86  | Intergenic    | rs12554086      | 9q21.31  | RR interval (heart rate) |       | rs12554086-A              | 0.39                  | 4.00E-07 | 2,325                                     | European ir NR  | 20031603 | Marroni      |
| 87  | Intergenic    | rs7318731       | 13q12.11 | RR interval (heart rate) |       | rs7318731-A               | 0.48                  | 1.00E-06 | 2,325                                     | European ir NR  | 20031603 | Marroni      |
| 88  | Intergenic    | rs1484948       | 11p12    | RR interval (heart rate) |       | rs1484948-G               | 0.32                  | 2.00E-06 | 2,325                                     | European ir NR  | 20031603 | Marroni      |
| 89  | AKT3          | rs4132509       | 1q44     | RR interval (heart rate) |       | rs4132509-A               | 0.21                  | 2.00E-06 | 2,325                                     | European ir NR  | 20031603 | Marroni      |
| 90  | Intergenic    | rs10496166      | 2p13.3   | RR interval (heart rate) |       | rs10496166-A              | 0.13                  | 4.00E-06 | 2,325                                     | European ir NR  | 20031603 | Marroni      |
| 91  | Intergenic    | rs13300284      | 9p21.3   | RR interval (heart rate) |       | rs13300284-A              | 0.04                  | 4.00E-06 | 2,325                                     | European ir NR  | 20031603 | Marroni      |
| 92  | Intergenic    | rs10514995      | 5q12.3   | RR interval (heart rate) |       | rs10514995-G              | 0.36                  | 1.00E-06 | 2,325                                     | European ir NR  | 20031603 | Marroni      |
| 93  | GPR133        | rs885389        | 12q24.33 | RR interval (heart rate) |       | rs885389-A                | 0.3                   | 4.00E-08 | 2,325                                     | European ir NR  | 20031603 | Marroni      |
| 94  | Intergenic    | rs2717128       | 18q23    | RR interval (heart rate) |       | rs2717128-G               | 0.14                  | 1.00E-06 | 2,325                                     | European ir NR  | 20031603 | Marroni      |
| 95  | Intergenic    | rs3117035       | 6p21.32  | RR interval (heart rate) |       | rs3117035-A               | 0.48                  | 1.00E-06 | 2,325                                     | European ir NR  | 20031603 | Marroni      |
| 96  | FRMD4A        | rs1541010       | 10p13    | RR interval (heart rate) |       | rs1541010-A               | 0.28                  | 1.00E-06 | 2,325                                     | European ir NR  | 20031603 | Marroni      |
| 97  | RASGRF1       | rs3743200       | 15q25.1  | RR interval (heart rate) |       | rs3743200-A               | 0.27                  | 2.00E-06 | 2,325                                     | European ir NR  | 20031603 | Marroni      |
| 98  | Intergenic    | rs4352210       | 2p22.2   | RR interval (heart rate) |       | rs4352210-A               | 0.37                  | 2.00E-06 | 2,325                                     | European ir NR  | 20031603 | Marroni      |
| 99  | Intergenic    | rs2670321       | 3q12.1   | RR interval (heart rate) |       | rs2670321-C               | 0.27                  | 2.00E-06 | 2,325                                     | European ir NR  | 20031603 | Marroni      |
| 100 | Intergenic    | rs12552736      | 9p21.3   | RR interval (heart rate) |       | rs12552736-G              | 0.06                  | 2.00E-06 | 2,325                                     | European ir NR  | 20031603 | Marroni      |
| 101 | Intergenic    | rs17706439      | 1q32.3   | RR interval (heart rate) |       | rs17706439-A              | 0.17                  | 3.00E-06 | 2,325                                     | European ir NR  | 20031603 | Marroni      |
| 102 | Intergenic    | rs3110127       | 8q12.1   | RR interval (heart rate) |       | rs3110127-A               | 0.33                  | 4.00E-06 | 2,325                                     | European ir NR  | 20031603 | Marroni      |
| 103 | Intergenic    | rs1447537       | 2p11.2   | RR interval (heart rate) |       | rs1447537-A               | 0.31                  | 4.00E-06 | 2,325                                     | European ir NR  | 20031603 | Marroni      |
| 104 | PITX2         | rs17042171      | 4q25     | Atrial fibrillation      |       | rs17042171-A              | 0.12                  | 4.00E-63 | 3,413 cases, 37,1C2,145 cases, 4,073 cont |                 | 19597492 | Benjamin     |
| 105 | MTHFR, NPPA   | rs17375901      | 1p36.22  | Atrial fibrillation      |       | rs17375901-T              | 0.053                 | 6.00E-07 | 3,413 cases, 37,1C2,145 cases, 4,073 cont |                 | 19597492 | Benjamin     |
| 106 | ZFH3          | rs2106261       | 16q22.3  | Atrial fibrillation      |       | rs2106261-T               | 0.174                 | 2.00E-15 | 3,413 cases, 37,1C2,145 cases, 4,073 cont |                 | 19597492 | Benjamin     |



**Supplemental Table 4 (Continued).** Cardiovascular disease large studies GWAS results

| No  | Reported Gene                              | Associated SNPs | Region   | Disease_Trait                                        | Trait | Strongest SNP Risk Allele | Risk allele frequency | P_Value  | Initial_Sampl                            | Replication_Sampl      | PUBMEDID | First Author |
|-----|--------------------------------------------|-----------------|----------|------------------------------------------------------|-------|---------------------------|-----------------------|----------|------------------------------------------|------------------------|----------|--------------|
| 107 | ZFHX3                                      | rs7193343       | 16q22.3  | Atrial fibrillation                                  |       | rs7193343-T               | NR                    | 1.00E-10 | 2,385 European c                         | up to 2,427 European c | 19597491 | Gudbjartsson |
| 108 | Intergenic                                 | rs2200733       | 4q25     | Atrial fibrillation                                  |       | rs2200733-?               | 0.12                  | 1.00E-14 | 2,385 European c                         | up to 2,427 European c | 19597491 | Gudbjartsson |
| 109 | OLFML2B, NOS1AP                            | rs12143842      | 1q23.3   | QT interval                                          |       | rs12143842-T              | 0.25                  | 1.00E-83 | 3,558 Caucasian ii                       | 29,527 Caucasian indiv | 19587794 | Nolte        |
| 110 | SLC35F1, C6orf204, PLN                     | rs11153730      | 6q22.31  | QT interval                                          |       | rs11153730-C              | 0.5                   | 2.00E-29 | 3,558 Caucasian ii                       | 29,527 Caucasian indiv | 19587794 | Nolte        |
| 111 | PALMD                                      | rs7543130       | 1p21.2   | Aortic root size                                     |       | rs7543130-A               | 0.49                  | 1.00E-07 | 12,612 European                          | 4,094 European ancest  | 19584346 | Vasan        |
| 112 | LOXL1                                      | rs893817        | 15q24.1  | Aortic root size                                     |       | rs893817-G                | 0.34                  | 3.00E-06 | 12,612 European                          | 4,094 European ancest  | 19584346 | Vasan        |
| 113 | CCDC100, PPIC                              | rs17470137      | 5q23.2   | Aortic root size                                     |       | rs17470137-A              | 0.29                  | 1.00E-11 | 12,612 European                          | 4,094 European ancest  | 19584346 | Vasan        |
| 114 | PDE3A                                      | rs10770612      | 12p12.2  | Aortic root size                                     |       | rs10770612-G              | 0.19                  | 2.00E-08 | 12,612 European                          | 4,094 European ancest  | 19584346 | Vasan        |
| 115 | HMG2                                       | rs4026608       | 12q14.3  | Aortic root size                                     |       | rs4026608-C               | 0.38                  | 2.00E-09 | 12,612 European                          | 4,094 European ancest  | 19584346 | Vasan        |
| 116 | SMG6, SRR, TSR1, SGSM2                     | rs10852932      | 17p13.3  | Aortic root size                                     |       | rs10852932-T              | 0.36                  | 2.00E-11 | 12,612 European                          | 4,094 European ancest  | 19584346 | Vasan        |
| 117 | WWOX                                       | rs2059238       | 16q23.1  | Cardiac structure and function (LV wall thickness)   |       | rs2059238-A               | 0.22                  | 3.00E-06 | 12,612 European                          | 4,094 European ancest  | 19584346 | Vasan        |
| 118 | GRID1                                      | rs7910620       | 10q23.1  | Cardiac structure and function (LV wall thickness)   |       | rs7910620-G               | 0.01                  | 7.00E-07 | 12,612 European                          | 4,094 European ancest  | 19584346 | Vasan        |
| 119 | SLC25A46                                   | rs17132261      | 5q22.1   | Cardiac structure and function (LV wall thickness)   |       | rs17132261-T              | 0.02                  | 9.00E-07 | 12,612 European                          | 4,094 European ancest  | 19584346 | Vasan        |
| 120 | SLC35F1, C6orf204, PLN                     | rs89107         | 6q22.31  | Cardiac structure and function (LV internal diastoli |       | rs89107-G                 | 0.5                   | 1.00E-09 | 12,612 European                          | 4,094 European ancest  | 19584346 | Vasan        |
| 121 | CD36                                       | rs10499859      | 7q21.11  | Left ventricular mass (Caucasian)                    |       | rs10499859-?              | 0.45                  | 3.00E-06 | 101 Caucasian cas                        | 704 Caucasian siblings | 19454037 | Arnett       |
| 122 | RAI14                                      | rs409045        | 5p13.2   | Left ventricular mass (Caucasian)                    |       | rs409045-?                | 0.38                  | 8.00E-07 | 101 Caucasian cas                        | 704 Caucasian siblings | 19454037 | Arnett       |
| 123 | LITAF, CLEC16A, SNN, ZC3H7A, TNFRSF17      | rs8049607       | 16p13.13 | QT interval                                          |       | rs8049607-T               | 0.49                  | 5.00E-15 | 13,685 individual                        | 15,854 individuals     | 19305408 | Newton-Cheh  |
| 124 | NOS1AP                                     | rs12143842      | 1q23.3   | QT interval                                          |       | rs12143842-T              | 0.26                  | 2.00E-78 | 13,685 individual                        | 15,854 individuals     | 19305408 | Newton-Cheh  |
| 125 | RNF207, NPHP4, CHDS, ACOT7, PLEKHG5, KLH21 | rs846111        | 1p36.31  | QT interval                                          |       | rs846111-C                | 0.28                  | 1.00E-16 | 13,685 individual                        | 15,854 individuals     | 19305408 | Newton-Cheh  |
| 126 | KCNH2                                      | rs4725982       | 7q36.1   | QT interval                                          |       | rs4725982-T               | 0.22                  | 5.00E-16 | 13,685 individual                        | 15,854 individuals     | 19305408 | Newton-Cheh  |
| 127 | KCNH2                                      | rs2968864       | 7q36.1   | QT interval                                          |       | rs2968864-C               | 0.25                  | 8.00E-16 | 13,685 individual                        | 15,854 individuals     | 19305408 | Newton-Cheh  |
| 128 | KCNQ1                                      | rs12576239      | 11p15.5  | QT interval                                          |       | rs12576239-T              | 0.13                  | 1.00E-15 | 13,685 individual                        | 15,854 individuals     | 19305408 | Newton-Cheh  |
| 129 | c6orf204, SLC35F1, PLN, ASF1A              | rs11756438      | 6q22.31  | QT interval                                          |       | rs11756438-A              | 0.47                  | 5.00E-22 | 13,685 individual                        | 15,854 individuals     | 19305408 | Newton-Cheh  |
| 130 | CNOT1, GINS3, NDRG4, SLC38A7, GOT2         | rs37062         | 16q21    | QT interval                                          |       | rs37062-G                 | 0.24                  | 3.00E-25 | 13,685 individual                        | 15,854 individuals     | 19305408 | Newton-Cheh  |
| 131 | LIG3, RFFL                                 | rs2074518       | 17q12    | QT interval                                          |       | rs2074518-T               | 0.46                  | 6.00E-12 | 13,685 individual                        | 15,854 individuals     | 19305408 | Newton-Cheh  |
| 132 | SCN5A                                      | rs12053903      | 3p22.2   | QT interval                                          |       | rs12053903-C              | 0.34                  | 1.00E-14 | 13,685 individual                        | 15,854 individuals     | 19305408 | Newton-Cheh  |
| 133 | NOS1AP                                     | rs16857031      | 1q23.3   | QT interval                                          |       | rs16857031-G              | 0.14                  | 1.00E-34 | 13,685 individual                        | 15,854 individuals     | 19305408 | Newton-Cheh  |
| 134 | NOS1AP                                     | rs12029454      | 1q23.3   | QT interval                                          |       | rs12029454-A              | 0.15                  | 3.00E-45 | 13,685 individual                        | 15,854 individuals     | 19305408 | Newton-Cheh  |
| 135 | KCNQ1                                      | rs2074238       | 11p15.5  | QT interval                                          |       | rs2074238-T               | 0.06                  | 3.00E-17 | 13,685 individual                        | 15,854 individuals     | 19305408 | Newton-Cheh  |
| 136 | ATP1B1                                     | rs10919071      | 1q24.2   | QT interval                                          |       | rs10919071-A              | 0.87                  | 1.00E-15 | 15,842 individual up to 13,602 individua |                        | 19305409 | Pfeufer      |
| 137 | PLN                                        | rs11970286      | 6q22.31  | QT interval                                          |       | rs11970286-T              | 0.44                  | 2.00E-24 | 15,842 individual up to 13,602 individua |                        | 19305409 | Pfeufer      |
| 138 | NDRG4                                      | rs7188697       | 16q21    | QT interval                                          |       | rs7188697-A               | 0.74                  | 7.00E-25 | 15,842 individual up to 13,602 individua |                        | 19305409 | Pfeufer      |
| 139 | NOS1AP                                     | rs12143842      | 1q23.3   | QT interval                                          |       | rs12143842-T              | 0.24                  | 2.00E-78 | 15,842 individual up to 13,602 individua |                        | 19305409 | Pfeufer      |
| 140 | KCNJ2                                      | rs17779747      | 17q24.3  | QT interval                                          |       | rs17779747-T              | 0.35                  | 6.00E-12 | 15,842 individual up to 13,602 individua |                        | 19305409 | Pfeufer      |
| 141 | RNF207                                     | rs846111        | 1p36.31  | QT interval                                          |       | rs846111-C                | 0.29                  | 4.00E-16 | 15,842 individual up to 13,602 individua |                        | 19305409 | Pfeufer      |
| 142 | NOS1AP                                     | rs4657178       | 1q23.3   | QT interval                                          |       | rs4657178-T               | 0.33                  | 7.00E-33 | 15,842 individual up to 13,602 individua |                        | 19305409 | Pfeufer      |
| 143 | SCN5A                                      | rs11129795      | 3p22.2   | QT interval                                          |       | rs11129795-A              | 0.23                  | 5.00E-14 | 15,842 individual up to 13,602 individua |                        | 19305409 | Pfeufer      |
| 144 | KCNH2                                      | rs2968863       | 7q36.1   | QT interval                                          |       | rs2968863-T               | 0.29                  | 2.00E-15 | 15,842 individual up to 13,602 individua |                        | 19305409 | Pfeufer      |
| 145 | KCNQ1                                      | rs12296050      | 11p15.5  | QT interval                                          |       | rs12296050-T              | 0.2                   | 3.00E-17 | 15,842 individual up to 13,602 individua |                        | 19305409 | Pfeufer      |
| 146 | PLN                                        | rs12210810      | 6q22.31  | QT interval                                          |       | rs12210810-C              | 0.06                  | 2.00E-17 | 15,842 individual up to 13,602 individua |                        | 19305409 | Pfeufer      |
| 147 | LITAF                                      | rs8049607       | 16p13.13 | QT interval                                          |       | rs8049607-T               | 0.46                  | 6.00E-15 | 15,842 individual up to 13,602 individua |                        | 19305409 | Pfeufer      |
| 148 | SCN5A                                      | rs7638909       | 3p22.2   | Electrocardiographic conduction (PR interval)        |       | rs7638909-G               | 0.4                   | 2.00E-06 | 1,262 Kosraen inc NR                     |                        | 19389651 | Smith        |
| 149 | NR                                         | rs283566        | 6p12.2   | Electrocardiographic conduction (P wave duration)    |       | rs283566-?                | 0.16                  | 9.00E-06 | 1,262 Kosraen inc NR                     |                        | 19389651 | Smith        |
| 150 | SCN5A                                      | rs2070488       | 3p22.2   | Electrocardiographic conduction (PR interval)        |       | rs2070488-A               | 0.33                  | 4.00E-06 | 1,262 Kosraen inc NR                     |                        | 19389651 | Smith        |
| 151 | MSX1                                       | rs2008242       | 4p16.1   | Electrocardiographic conduction (PR segment)         |       | rs2008242-?               | 0.15                  | 3.00E-06 | 1,262 Kosraen inc NR                     |                        | 19389651 | Smith        |
| 152 | NR                                         | rs17030434      | 4q31.3   | Electrocardiographic conduction (P wave duration)    |       | rs17030434-?              | 0.43                  | 5.00E-06 | 1,262 Kosraen inc NR                     |                        | 19389651 | Smith        |
| 153 | Intergenic                                 | rs2461751       | 2q31.1   | Electrocardiographic conduction (PR interval)        |       | rs2461751-G               | 0.44                  | 8.00E-06 | 1,262 Kosraen inc NR                     |                        | 19389651 | Smith        |
| 154 | NR                                         | rs7512898       | 1q32.1   | Electrocardiographic conduction (PR segment)         |       | rs7512898-?               | 0.41                  | 5.00E-06 | 1,262 Kosraen inc NR                     |                        | 19389651 | Smith        |

**Supplemental Table 4 (Continued).** Cardiovascular disease large studies GWAS results

| No  | Reported Gene        | Associated SNPs               | Region   | Disease_Trait                       | Trait         | Strongest SNP Risk Allele | Risk allele frequency | P_Value  | Initial_Sampl                               | Replication_Sampl | PUBMEDID | First Author |
|-----|----------------------|-------------------------------|----------|-------------------------------------|---------------|---------------------------|-----------------------|----------|---------------------------------------------|-------------------|----------|--------------|
| 155 | MRAS                 | rs9818870                     | 3q22.3   | Coronary heart disease              |               | rs9818870-T               | 0.15                  | 7.00E-13 | 6,990 cases, 8,951,247 cases, 12,411 cc     |                   | 19198612 | Erdmann      |
| 156 | HNF1A,C12orf43       | rs2259816                     | 12q24.31 | Coronary heart disease              |               | rs2259816-T               | 0.36                  | 5.00E-07 | 6,990 cases, 8,951,247 cases, 12,411 cc     |                   | 19198612 | Erdmann      |
| 157 | LDLR                 | rs1122608                     | 19p13.2  | Myocardial infarction (early onset) |               | rs1122608-G               | 0.75                  | 2.00E-09 | 2,967 cases, 3,075,746 cases, 9,746 cont    |                   | 19198609 | Kathiresan   |
| 158 | PHACTR1              | rs12526453                    | 6p24.1   | Myocardial infarction (early onset) |               | rs12526453-C              | 0.65                  | 1.00E-09 | 2,967 cases, 3,075,746 cases, 9,746 cont    |                   | 19198609 | Kathiresan   |
| 159 | WDR12                | rs6725887                     | 2q33.1   | Myocardial infarction (early onset) |               | rs6725887-C               | 0.14                  | 1.00E-08 | 2,967 cases, 3,075,746 cases, 9,746 cont    |                   | 19198609 | Kathiresan   |
| 160 | PCSK9                | rs11206510                    | 1p32.3   | Myocardial infarction (early onset) |               | rs11206510-T              | 0.81                  | 1.00E-08 | 2,967 cases, 3,075,746 cases, 9,746 cont    |                   | 19198609 | Kathiresan   |
| 161 | MIA3                 | rs17465637                    | 1q41     | Myocardial infarction (early onset) |               | rs17465637-C              | 0.72                  | 1.00E-09 | 2,967 cases, 3,075,746 cases, 9,746 cont    |                   | 19198609 | Kathiresan   |
| 162 | CXCL12               | rs1746048                     | 10q11.21 | Myocardial infarction (early onset) |               | rs1746048-C               | 0.84                  | 7.00E-09 | 2,967 cases, 3,075,746 cases, 9,746 cont    |                   | 19198609 | Kathiresan   |
| 163 | SLC5A3, MRPS6, KCNE2 | rs9982601                     | 21q22.11 | Myocardial infarction (early onset) |               | rs9982601-T               | 0.13                  | 6.00E-11 | 2,967 cases, 3,075,746 cases, 9,746 cont    |                   | 19198609 | Kathiresan   |
| 164 | CELSR2, PSRC1, SORT1 | rs646776                      | 1p13.3   | Myocardial infarction (early onset) |               | rs646776-T                | 0.81                  | 8.00E-12 | 2,967 cases, 3,075,746 cases, 9,746 cont    |                   | 19198609 | Kathiresan   |
| 165 | CDKN2A, CDKN2B       | rs4977574                     | 9p21.3   | Myocardial infarction (early onset) |               | rs4977574-G               | 0.56                  | 3.00E-44 | 2,967 cases, 3,075,746 cases, 9,746 cont    |                   | 19198609 | Kathiresan   |
| 166 | SLC22A3,LPAL2,LPA    | rs2048327,rs3127599,rs77625.3 | 6q25.3   | Coronary heart disease              | (CTTG)        | 4-SNP haplotype-1         | 0.16                  | 1.00E-09 | 1,926 cases, 2,938,707 cases, 7,325 cont    |                   | 19198611 | Tregouet     |
| 167 | SLC22A3,LPAL2,LPA    | rs2048327,rs3127599,rs77625.3 | 6q25.3   | Coronary heart disease              | (CCTC)        | 4-SNP haplotype-2         | 0.02                  | 4.00E-15 | 1,926 cases, 2,938,707 cases, 7,325 cont    |                   | 19198611 | Tregouet     |
| 168 | Intergenic           | rs10498345                    | 14q21.1  | Coronary spasm                      |               | rs10498345-T              | 0.3                   | 9.00E-07 | 50 Japanese femi;151 Japanese female c      |                   | 18075462 | Suzuki       |
| 169 | Intergenic           | rs4776472                     | 15q23    | Atrial fibrillation                 |               | rs4776472-?               | NR                    | 8.00E-06 | 1,341-1,345 indiv NR                        |                   | 17903304 | Larson       |
| 170 | CNTN5                | rs10501920                    | 11q22.1  | Atrial fibrillation                 |               | rs10501920-?              | NR                    | 9.00E-06 | 1,341-1,345 indiv NR                        |                   | 17903304 | Larson       |
| 171 | Intergenic           | rs958546                      | 13q14.12 | Atrial fibrillation                 |               | rs958546-?                | NR                    | 5.00E-06 | 1,341-1,345 indiv NR                        |                   | 17903304 | Larson       |
| 172 | KIAA1598             | rs740363                      | 10q25.3  | Heart failure                       |               | rs740363-?                | NR                    | 9.00E-06 | 1,341-1,345 indiv NR                        |                   | 17903304 | Larson       |
| 173 | Intergenic           | rs499818                      | 6p24.1   | Major CVD                           | (major CVD)   | rs499818-?                | NR                    | 7.00E-06 | 1,341-1,345 indiv NR                        |                   | 17903304 | Larson       |
| 174 | RPL21                | rs10507380                    | 13q12.2  | Electrocardiographic traits         | (QT interval) | rs10507380-?              | NR                    | 8.00E-06 | 548-1,175 individ NR                        |                   | 17903306 | Newton-Cheh  |
| 175 | Intergenic           | rs882300                      | 2q22.1   | Electrocardiographic traits         | (PR interval) | rs882300-?                | NR                    | 3.00E-07 | 548-1,175 individ NR                        |                   | 17903306 | Newton-Cheh  |
| 176 | NEIL3                | rs1395479                     | 4q34.3   | Heart rate variability traits       | (LF/HF)       | rs1395479-?               | NR                    | 7.00E-06 | 548-1,175 individ NR                        |                   | 17903306 | Newton-Cheh  |
| 177 | DCAMK1               | rs9315385                     | 13q13.3  | Heart rate variability traits       | (total power) | rs9315385-?               | NR                    | 8.00E-06 | 548-1,175 individ NR                        |                   | 17903306 | Newton-Cheh  |
| 178 | NUMB                 | rs10483853                    | 14q24.2  | Coronary artery calcification       |               | rs10483853-?              | NR                    | 6.00E-06 | 673-984 individuz NR                        |                   | 17903303 | O'Donnell    |
| 179 | Intergenic           | rs2390582                     | 1p22.2   | Coronary artery calcification       |               | rs2390582-?               | NR                    | 1.00E-06 | 673-984 individuz NR                        |                   | 17903303 | O'Donnell    |
| 180 | DRIM                 | rs10507130                    | 12q23.2  | Coronary artery calcification       |               | rs10507130-?              | NR                    | 7.00E-06 | 673-984 individuz NR                        |                   | 17903303 | O'Donnell    |
| 181 | CXCL12               | rs501120                      | 10q11.21 | Coronary heart disease              |               | rs501120-T                | 0.87                  | 9.00E-08 | 1,926 cases, 2,938 875 cases, 1,644 contro  |                   | 17634449 | Samani       |
| 182 | MIA3                 | rs17465637                    | 1q41     | Coronary heart disease              |               | rs17465637-C              | 0.71                  | 1.00E-06 | 1,926 cases, 2,938 875 cases, 1,644 contro  |                   | 17634449 | Samani       |
| 183 | MTHFD1L              | rs6922269                     | 6q25.1   | Coronary heart disease              |               | rs6922269-A               | 0.25                  | 3.00E-08 | 1,926 cases, 2,938 875 cases, 1,644 contro  |                   | 17634449 | Samani       |
| 184 | pseudogene           | rs2943634                     | 2q36.3   | Coronary heart disease              |               | rs2943634-C               | 0.65                  | 2.00E-07 | 1,926 cases, 2,938 875 cases, 1,644 contro  |                   | 17634449 | Samani       |
| 185 | Intergenic           | rs1333049                     | 9p21.3   | Coronary heart disease              |               | rs1333049-C               | 0.47                  | 3.00E-19 | 1,926 cases, 2,938 875 cases, 1,644 contro  |                   | 17634449 | Samani       |
| 186 | PSRC1                | rs599839                      | 1p13.3   | Coronary heart disease              |               | rs599839-A                | 0.77                  | 4.00E-09 | 1,926 cases, 2,938 875 cases, 1,644 contro  |                   | 17634449 | Samani       |
| 187 | SMAD3                | rs17228212                    | 15q22.33 | Coronary heart disease              |               | rs17228212-C              | 0.3                   | 2.00E-07 | 1,926 cases, 2,938 875 cases, 1,644 contro  |                   | 17634449 | Samani       |
| 188 | PITX2,ENPEP          | rs2200733                     | 4q25     | Atrial fibrillation/atrial flutter  |               | rs2200733-T               | 0.11                  | 3.00E-41 | 550 cases, 4,476 c3, 363 cases, 17,616 con  |                   | 17603472 | Gudbjartsson |
| 189 | PITX2,ENPEP          | rs10033464                    | 4q25     | Atrial fibrillation/atrial flutter  |               | rs10033464-T              | 0.08                  | 7.00E-11 | 550 cases, 4,476 c3, 363 cases, 17,616 con  |                   | 17603472 | Gudbjartsson |
| 190 | CDKN2A,CDKN2B        | rs1333049                     | 9p21.3   | Coronary heart disease              |               | rs1333049-C               | 0.47                  | 1.00E-13 | 1,926 cases, 2,938 (see Samani 2007)        |                   | 17554300 | WTCCC        |
| 191 | Intergenic           | rs17672135                    | 1q43     | Coronary heart disease              |               | rs17672135-T              | 0.87                  | 2.00E-06 | 1,926 cases, 2,938 (see Samani 2007)        |                   | 17554300 | WTCCC        |
| 192 | Intergenic           | rs8055236                     | 16q23.3  | Coronary heart disease              |               | rs8055236-G               | 0.8                   | 6.00E-06 | 1,926 cases, 2,938 (see Samani 2007)        |                   | 17554300 | WTCCC        |
| 193 | Intergenic           | rs688034                      | 22q12.1  | Coronary heart disease              |               | rs688034-T                | 0.31                  | 4.00E-06 | 1,926 cases, 2,938 (see Samani 2007)        |                   | 17554300 | WTCCC        |
| 194 | CDKN2A,CDKN2B        | rs10757278                    | 9p21.3   | Myocardial infarction               |               | rs10757278-G              | 0.45                  | 1.00E-20 | 1,607 cases, 6,728 2,980 cases, 6,309 cont  |                   | 17478679 | Helgadottir  |
| 195 | NOS1AP               | rs10494366                    | 1q23.3   | QT interval                         |               | rs10494366-?              | 0.36                  | 1.00E-10 | 100 > 445ms, 100 < 200 > 85th pct, 200 < 15 |                   | 16648850 | Arking       |

**Footnote:** More recent information on GWAS for CVD is available from Hindorff LA, Junkins HA, Hall PN, Mehta JP, and Manolio

TA. A Catalog of Published Genome-Wide Association Studies, at: [www.genome.gov/gwastudies](http://www.genome.gov/gwastudies).

**Supplemental Table 5.** A summary of statistical analysis and other information from large BP studies.

| Reference | Trait                        | Genetic model | Statistics                | Adjustment for ANTI-HT treatment | Association software         | Software pathways | Number of SNPs | R <sup>2</sup> (%) | Exonic      | Design                         |
|-----------|------------------------------|---------------|---------------------------|----------------------------------|------------------------------|-------------------|----------------|--------------------|-------------|--------------------------------|
| 22**      | HT, SBP, DBP                 | Additive      | Regression, Meta-analysis | SBP+10, DBP+5mmHg                | PLINK, R, LMEKIN<br>ProbABEL | Gene Expression   | 10             | 1.0                | 1 missense  | Family based                   |
| 40        | HT                           | Trend test    | Bayes factor              | NA†                              | NA                           | None              | 0              | NA                 | NA          | Case/control                   |
| 43**      | SBP, DBP, HT                 | Additive      | Regression, Meta-analysis | SBP+15, DBP+10mmHG               | SNPTEST, PLINK,<br>ProbABEL, | None              | 8              | 0.55               | None        | Case/control                   |
| 44        | ACE activity                 | Additive      | GLM, Stepwise reg         | ACEI (0, 1)                      | NA                           | None              | 1              | 16.2               | 1 cds-synon | Case/control<br>& family based |
| 56        | HT, SBP, DBP                 | Additive      | Logisitc reg, Regression  | YES (method NA*)                 | PLINK                        | GeneGO            | 10             | NA                 | 1 missense  | Family based                   |
| 60*       | SBP, DBP                     | Additive      | Trend test                | NO adjustment                    | PLINK, SAS                   | None              | 1              | NA                 | None        | Family based                   |
| 68*       | SBP, DBP                     | Additive      | Regression                |                                  | PLINK/QFAM                   | None              | 2              | 4.3                | None        | Family based                   |
| 70        | SBP, DBP, HT                 | Add, Dom      | Logistic reg, Regression  | NO adjustment                    | PLINK                        | None              | 1              | NA                 | None        | Case/control                   |
| 72        | HT                           | Additive      | Logisitc reg, Haplotype   | NA                               | SAS, Helix tree              | None              | 2              | NA                 | None        | Case/control<br>& family based |
| 73        | SBP, DBP                     | Add, Dom, Rec | Regression, Meta-analysis | NO adjustment                    | FBAT, METAL                  | Gene Expression   | 2              | NA                 | None        | Family based                   |
| 74        | DBP                          | Additive      | Regression                | Measured effect                  | Helix tree                   | None              | 3              | NA                 | None        | Case/control                   |
| 75        | SBP, DBP,<br>10 year average | Additive      | Regression                | NO adjustment                    | FBAT                         | None              | 2              | NA                 | None        | Family based                   |

†NA- not available; \*, \*\* see the corresponding references in the text highlighted for their importance

**Supplemental Figure 1.** Blood pressure factors for African Americans and whites in the HyperGEN study. We have reported 4 factor scores for metabolic syndrome by using multivariate factor analysis on 11 traits BMI, WC, WHR, PBF, INS, GLUC, LDLC, HDLC, TG, SBP, and DBP (see text and reference [31] for details). Factor loadings of standardized variables used in this analysis represent correlation coefficients of factor scores and original variables. The BP factors for two HyperGEN ethnicities are mainly contributions of SBP and DBP.

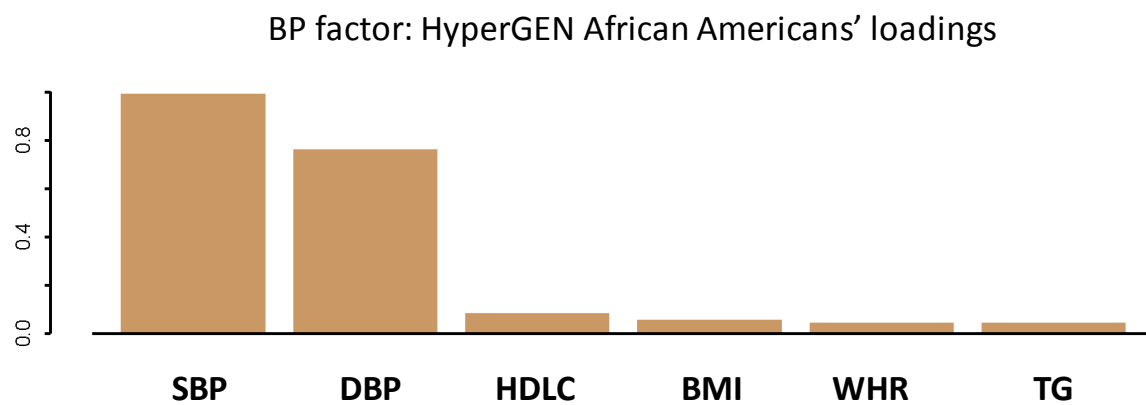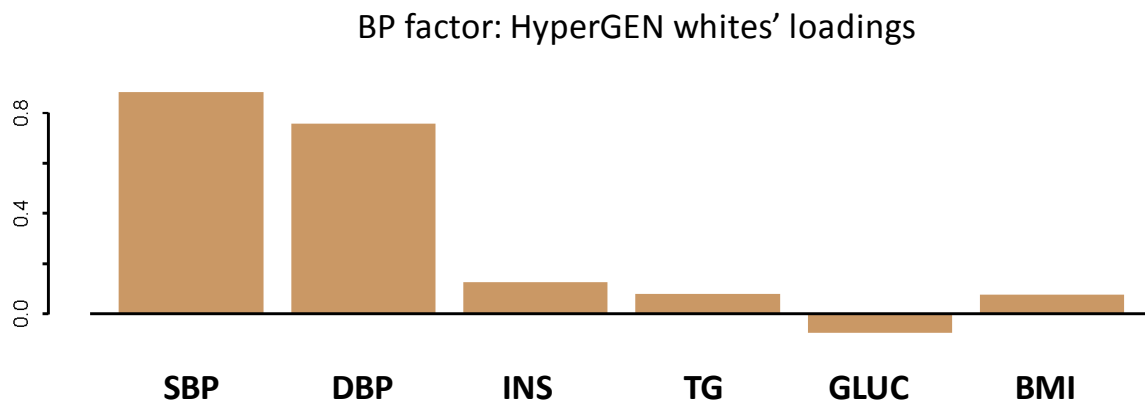

**Supplemental Figure 2.** HyperGEN African Americans genome wide association tests results between BP-factor and single SNPs under additive genetic model in a statistical mixed regression analysis accounting for familial relationship and genetic heterogeneity.

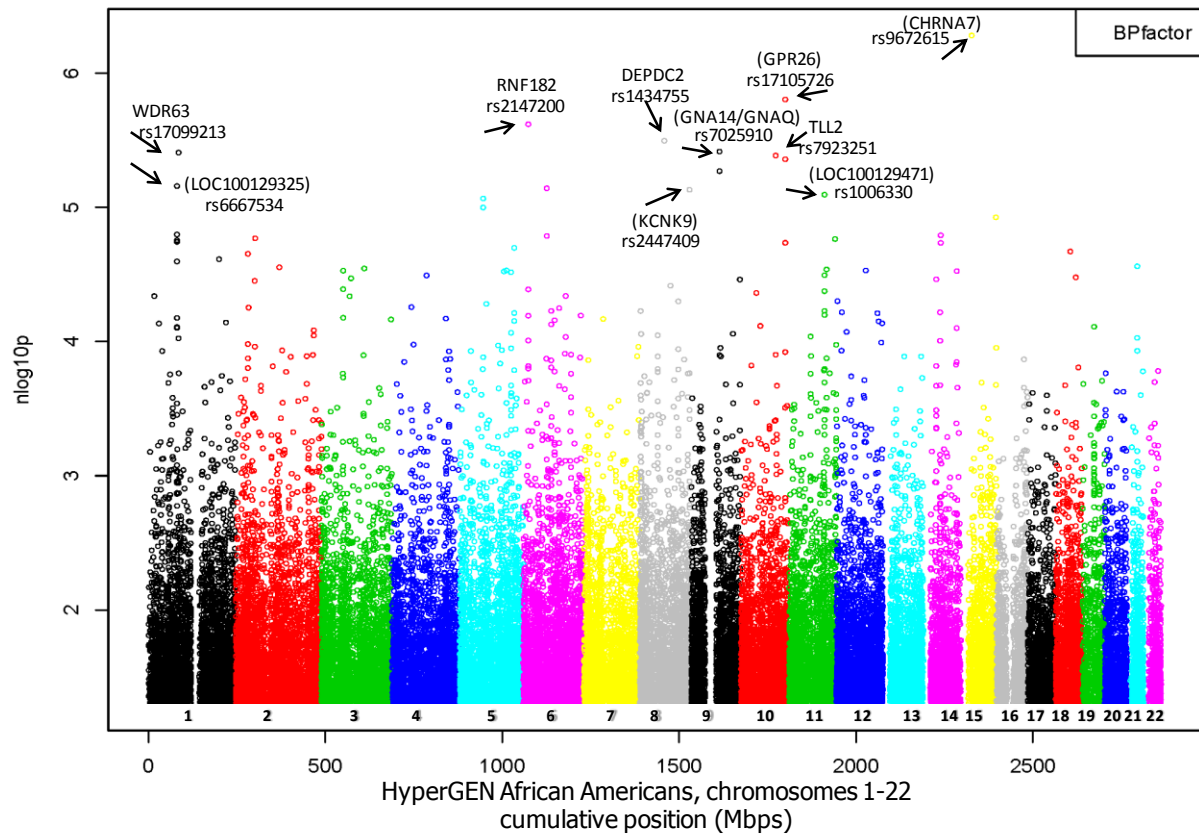

**Supplemental Figure 3.** HyperGEN whites genome wide association tests results between BP-factor and single SNPs under additive genetic model in a statistical mixed regression analysis accounting for familial relationship.

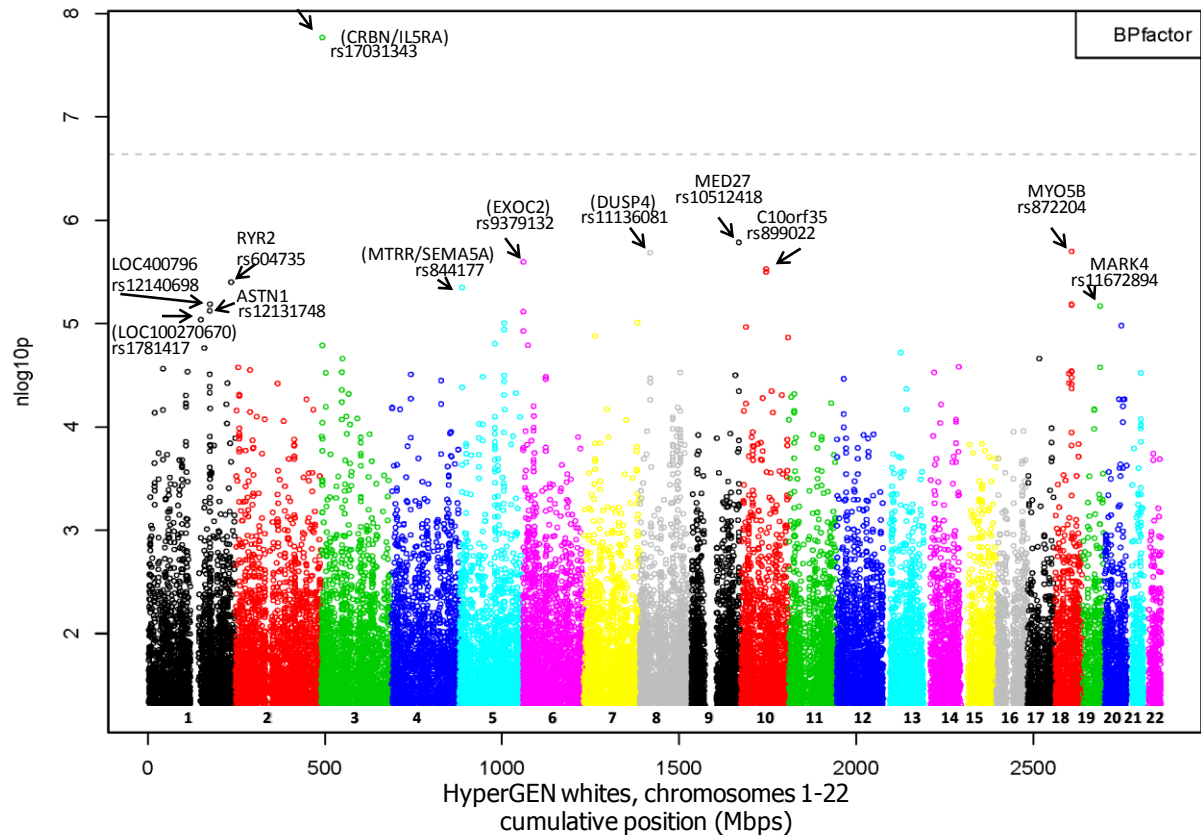

**Supplemental Figure 4.** A presentation of a coarse cytogenetic ideogram for results of large studies on BP/ HT/ pulse rate, CVD/ quantitative heart traits, and HyperGEN study. (A number within red 8-point-star shape shows how many times the same cytogenetic location was replicated by several studies).

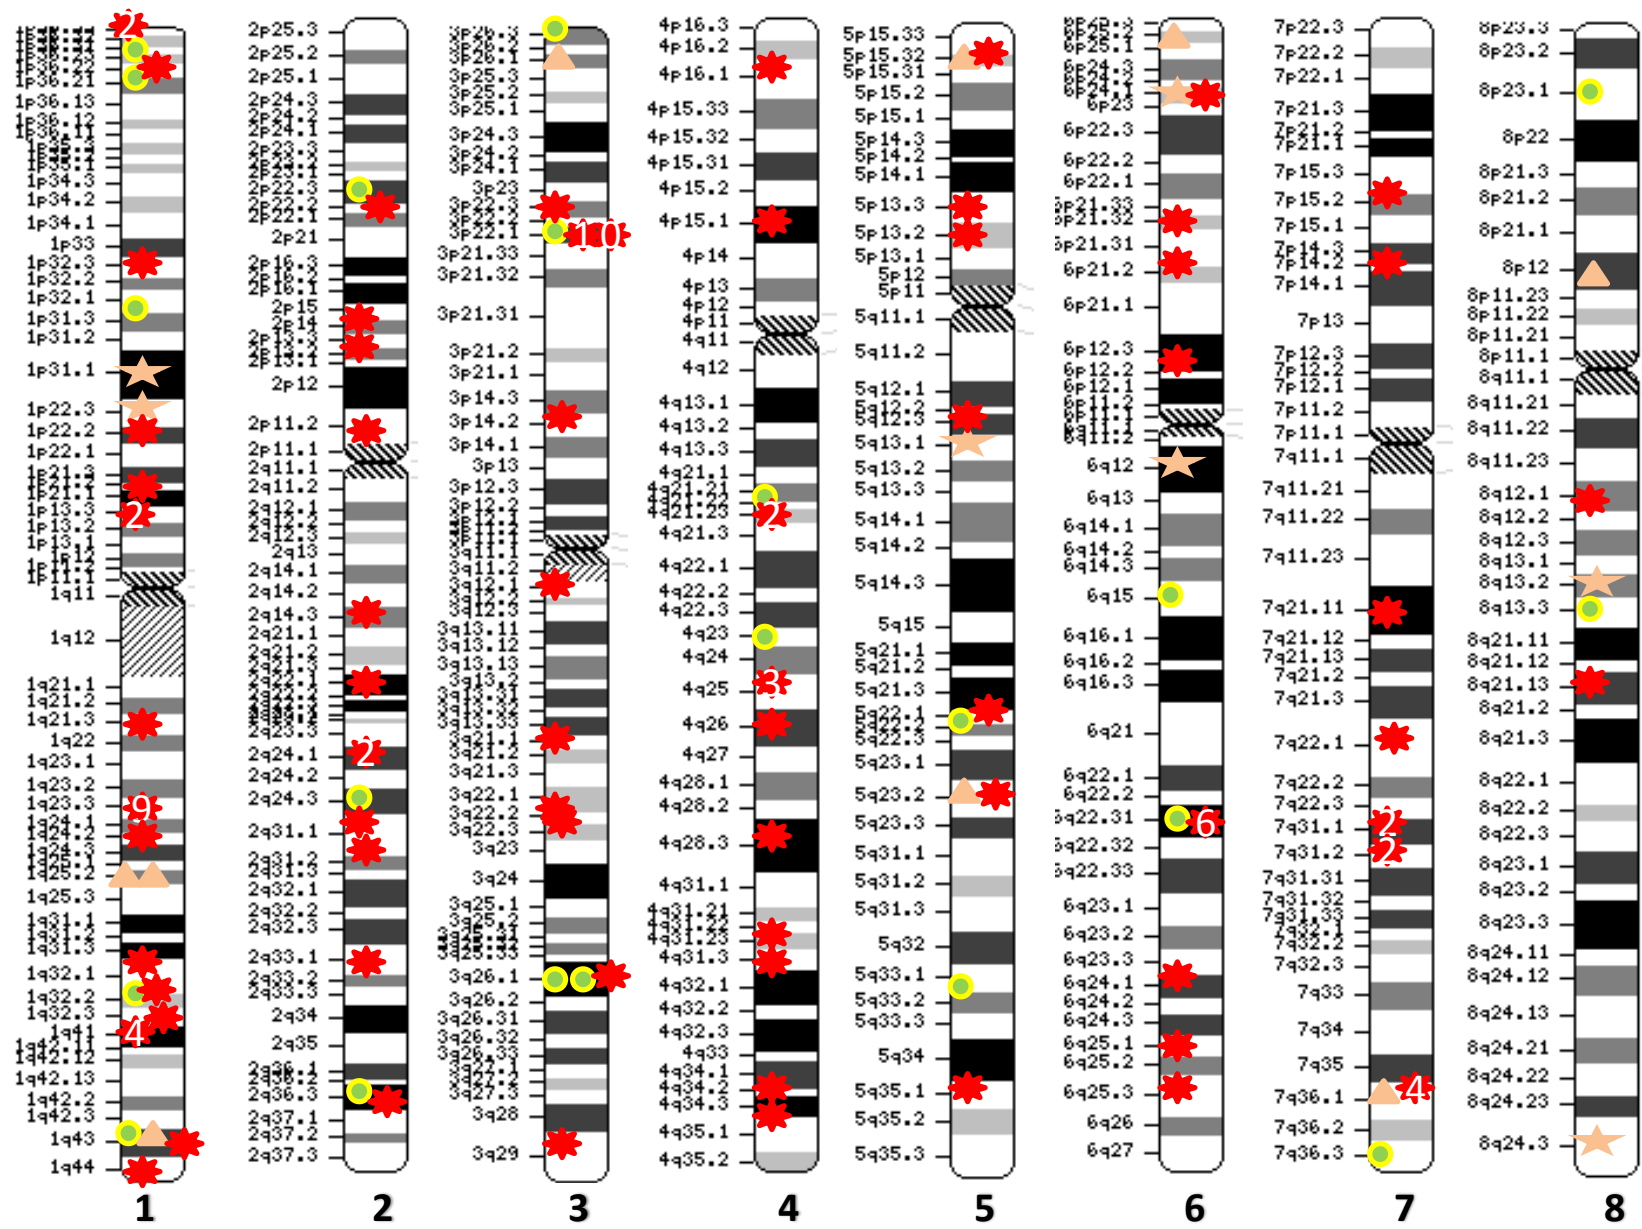



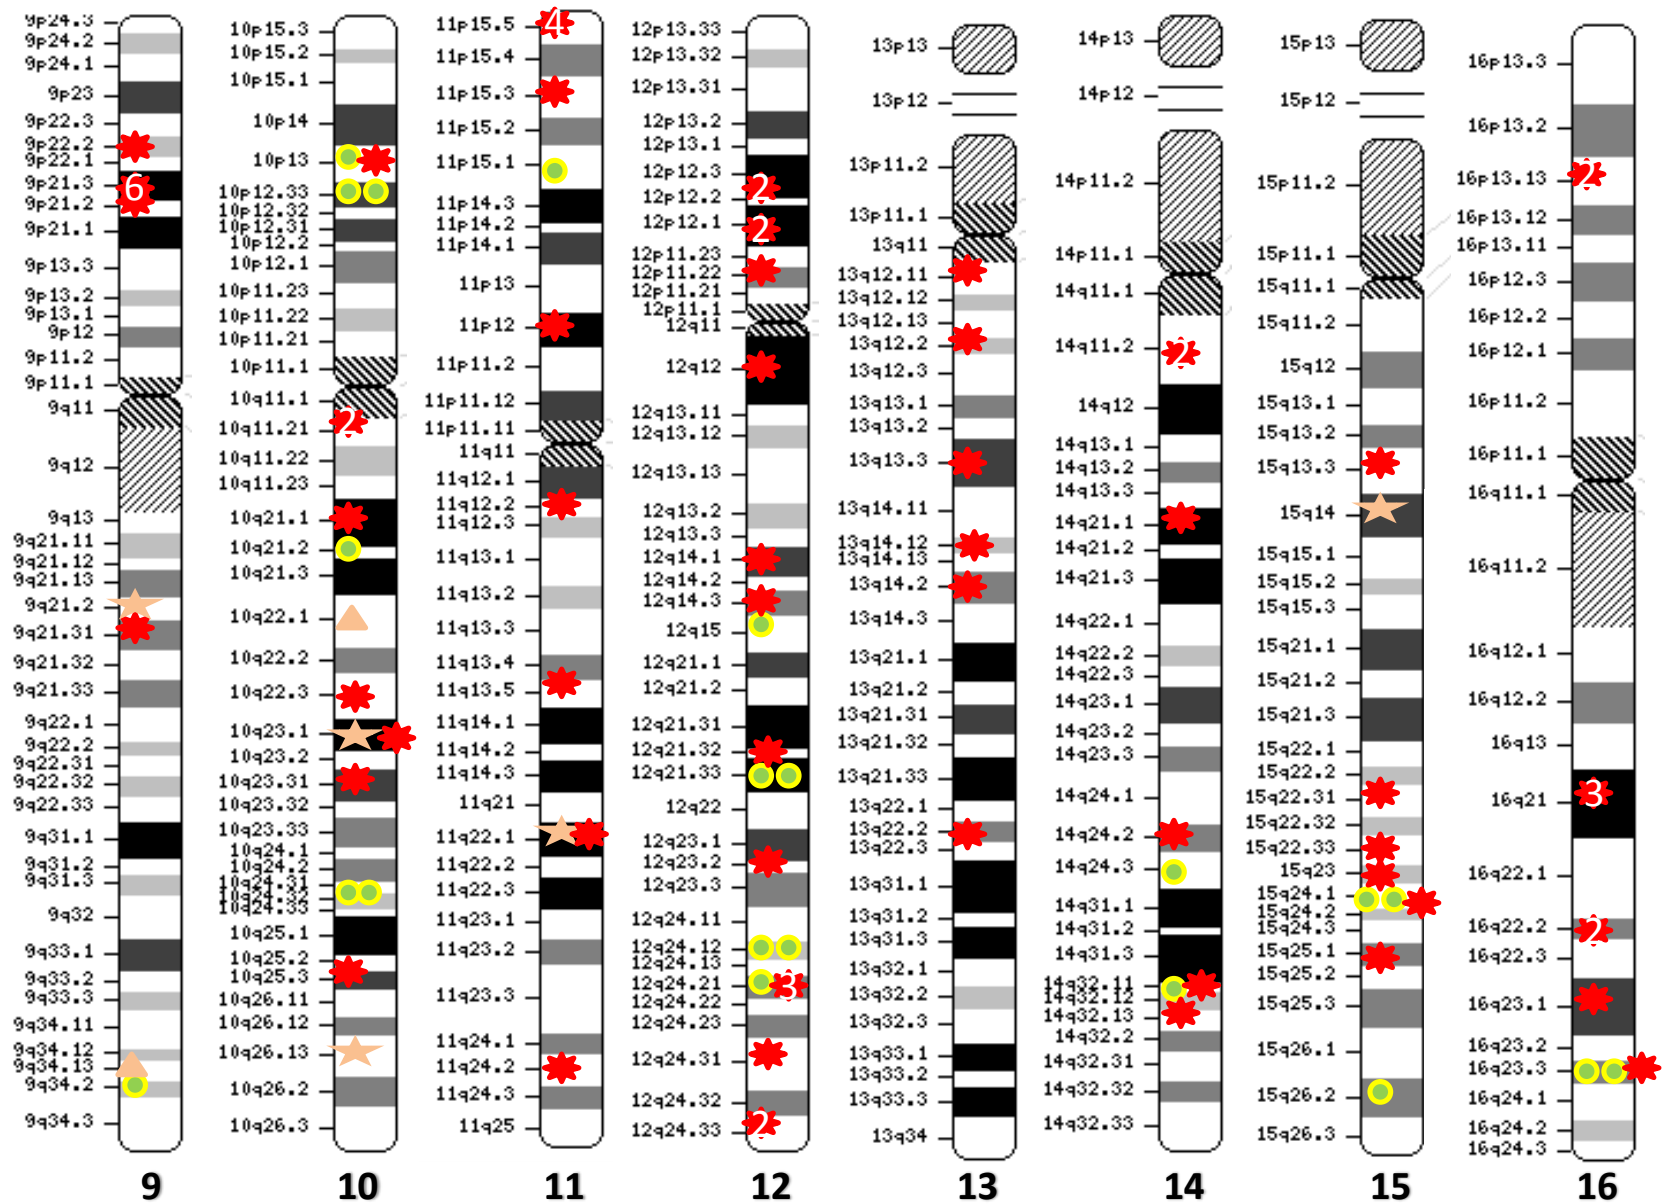

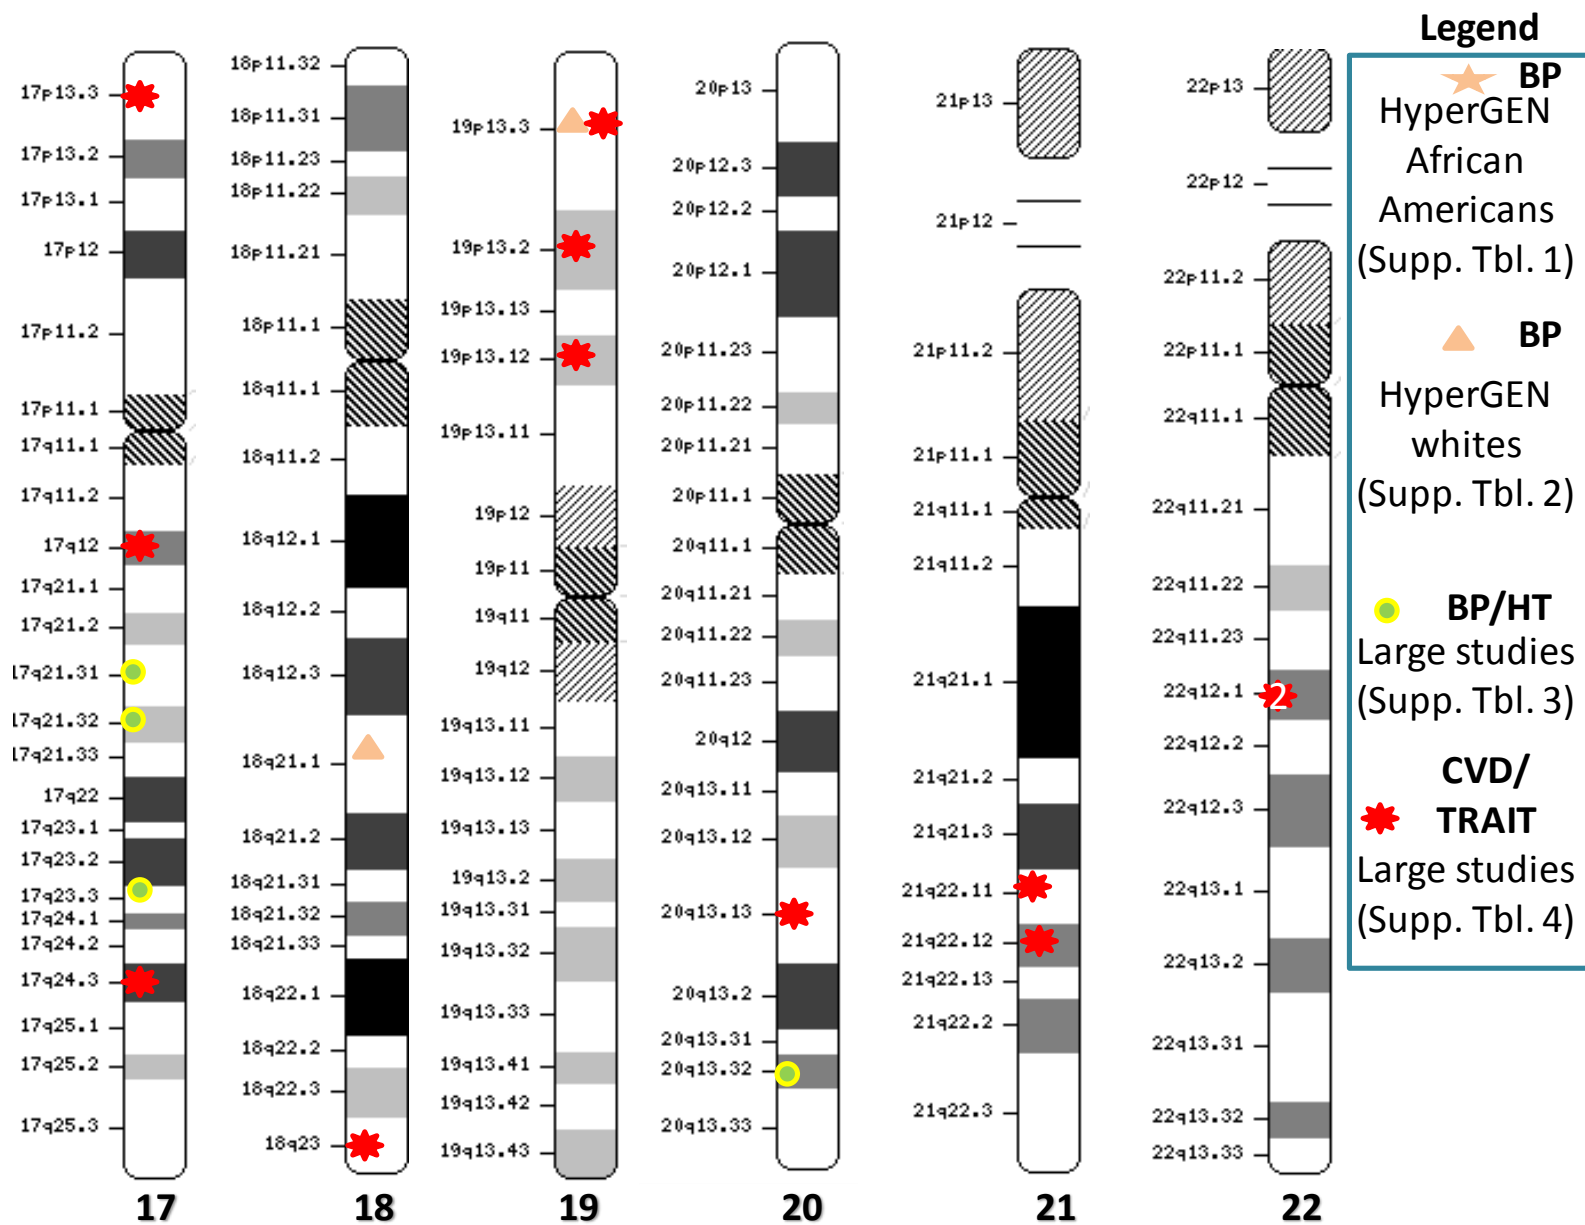

Supplement: NIHMS265187-supplement-1.pdf [file NIHMS265187-supplement-1.pdf]
